# Supplementary material for: Protocol for a prospective cohort study on the feasibility of application of nutritional ultrasound in the diagnosis and follow-up of patients with nutritional risk at hospital discharge: study on body composition and function (DRECO)
Source: PubMed Central journal article supplement — BMJ Open. 2023 Dec 8;13(12):e074945. doi: 10.1136/bmjopen-2023-074945 (PMC10729227; doi:10.1136/bmjopen-2023-074945), 2023-12-08
Supplement: bmjopen-2023-074945.draft_revisions.pdf [file bmjopen-2023-074945.draft_revisions.pdf]

# BMJ Open

BMJ Open is committed to open peer review. As part of this commitment we make the peer review history of every article we publish publicly available.

When an article is published we post the peer reviewers' comments and the authors' responses online. We also post the versions of the paper that were used during peer review. These are the versions that the peer review comments apply to.

The versions of the paper that follow are the versions that were submitted during the peer review process. They are not the versions of record or the final published versions. They should not be cited or distributed as the published version of this manuscript.

BMJ Open is an open access journal and the full, final, typeset and author-corrected version of record of the manuscript is available on our site with no access controls, subscription charges or pay-per-view fees (<http://bmjopen.bmj.com>).

If you have any questions on BMJ Open's open peer review process please email [info.bmjopen@bmj.com](mailto:info.bmjopen@bmj.com)

# BMJ Open

**Protocol for a prospective cohort study on the feasibility of application of nutritional ultrasound in the diagnosis and follow-up of patients with nutritional risk at hospital discharge: Study on body composition and function (DRECO).**

|                               |                                                                                                                                                                                                                                                                                                                                                                                                                                                                                                                                                                                                                   |
|-------------------------------|-------------------------------------------------------------------------------------------------------------------------------------------------------------------------------------------------------------------------------------------------------------------------------------------------------------------------------------------------------------------------------------------------------------------------------------------------------------------------------------------------------------------------------------------------------------------------------------------------------------------|
| Journal:                      | <i>BMJ Open</i>                                                                                                                                                                                                                                                                                                                                                                                                                                                                                                                                                                                                   |
| Manuscript ID                 | bmjopen-2023-074945                                                                                                                                                                                                                                                                                                                                                                                                                                                                                                                                                                                               |
| Article Type:                 | Protocol                                                                                                                                                                                                                                                                                                                                                                                                                                                                                                                                                                                                          |
| Date Submitted by the Author: | 24-Apr-2023                                                                                                                                                                                                                                                                                                                                                                                                                                                                                                                                                                                                       |
| Complete List of Authors:     | García Almeida, José Manuel; Hospital Universitario Virgen de la Victoria, Bellido, Diego; Complejo Hospitalario de Ferrol, Department of Endocrinology and Nutrition<br>De Luis, D.A; Institute of Endocrinology and Nutrition, Medicine School and Department of Endocrinology and Investigation, Hospital Clínico Universitario, University of Valladolid, Department of Endocrinology and Nutrition<br>Guzmán Rolo, Germán ; Abbott Laboratories, Medical department Oliveira, Gabriel; Universidad de Málaga, Regional University Hospital of Málaga. University of Málaga. IBIMA BIONAND Platform of Málaga |
| Keywords:                     | NUTRITION & DIETETICS, Ultrasound < RADIOLOGY & IMAGING, Nutritional support < GASTROENTEROLOGY                                                                                                                                                                                                                                                                                                                                                                                                                                                                                                                   |
|                               |                                                                                                                                                                                                                                                                                                                                                                                                                                                                                                                                                                                                                   |

SCHOLARONE™  
Manuscripts

1  
2  
3  
4  
5  
6  
7  
8  
9  
10  
11  
12  
13  
14  
15  
16  
17  
18  
19  
20  
21  
22  
23  
24  
25  
26  
27  
28  
29  
30  
31  
32  
33  
34  
35  
36  
37  
38  
39  
40  
41  
42  
43  
44  
45  
46  
47  
48  
49  
50  
51  
52  
53  
54  
55  
56  
57  
58  
59  
60

1 **Protocol for a prospective cohort study on the feasibility of application of nutritional**  
2 **ultrasound in the diagnosis and follow-up of patients with nutritional risk at hospital**  
3 **discharge: Study on body composition and function (DRECO).**

4 José Manuel García Almeida<sup>a\*</sup>, Diego Bellido<sup>b</sup>, Daniel de Luis Román<sup>c</sup>, Germán Guzmán  
5 Rolo<sup>d</sup> and Gabriel Oliveira<sup>e</sup>

6 a) *Department of Endocrinology and Nutrition, Hospital Universitario Virgen de la Victoria, IBIMA, CIBEROBN, Hospital Quirónsalud,*  
7 *University of Málaga, Spain; jgarciaalmeida@gmail.com*

8 b) *Department of Endocrinology and Nutrition, Complejo Hospitalario de Ferrol, A Coruña, Spain; diegobellido@gmail.com*

9 c) *Department of Endocrinology and Nutrition, Institute of Endocrinology and Nutrition, Medicine School and Department of Endocrinology and Investigation,*

10 d) *Medical department. Abbott Laboratories. Spain; german.guzman1@abbott.com*

11 e) *Department of Endocrinology and Nutrition. Regional University Hospital of Málaga. University of Málaga. IBIMA BIONAND Platform*  
12 *of Málaga, Spain; gabrielm.oliveira.sspa@juntadeandalucia.es*

13 *\*Corresponding author. Dr. José Manuel García Almeida. Department of Endocrinology and Nutrition, Hospital Universitario Virgen de la Victoria,*  
14 *IBIMA, CIBEROBN, Hospital Quirónsalud, University of Málaga, Spain; jgarciaalmeida@gmail.com. Campus de Teatinos s/n, 29010, Málaga. +34*  
15 *646314182*

16 **ABSTRACT**

17 **Background:** Nutritional ultrasound is an emerging technique in clinical nutrition for the  
18 morphological and structural study of muscle mass. Currently, all definitions of malnutrition  
19 include the measurement of muscle mass, however, there is no single way to assess it. It is  
20 necessary to develop new techniques to identify muscle involvement in malnutrition that are  
21 valid, standardized, reliable, accurate and profitable.

22 **Objective:** To value the new muscle ultrasound techniques aimed to measure muscle and  
23 functional status, to make a more accurate diagnosis and a better prediction of complications  
24 and morbidity and mortality in patients at nutritional risk. Primary outcome: to assess the  
25 feasibility of ultrasound or muscle ultrasound techniques in both nutritional diagnosis and  
26 follow-up in a nutritional intervention program.

27 **Methods and analysis:** DRECO (Disease-Related caloric-protein malnutrition EChOgraphy)  
28 is a prospective, multicenter (25 Spanish hospitals), uncontrolled clinical study in standard  
29 clinical practice to value the usefulness of nutritional ultrasound (muscle ultrasound) in the  
30 nutritional diagnosis and follow-up, over 3 to 6 months, after standard nutritional clinical  
31 practice intervention and physical activity, to control their disease-related malnutrition. 1000  
32 patients are expected to be included in.

33 **Discussion:** This study will standardize nutritional ultrasound measures. It will validate and  
34 define specific cut-off values for nutritional ultrasound and correlate it with already well-known  
35 nutritional tools such as SGA (Subjective Global Assessment) or GLIM (Global Leadership  
36 Initiative on Malnutrition) criteria. Thus, muscle ultrasound will become not only a tool to

37 diagnose malnutrition, but it will be integrated in the daily practice to evaluate nutritional  
38 interventions.

39 **Ethics and dissemination Ethical:** All DRECO study materials have been approved by each  
40 of the IRB/IEC of all the sites enrolled (either approval of the own IRB/IEC or validating the  
41 approval of the IRB/IEC of another hospital). The study has been registered with  
42 ClinicalTrials.gov, on June 27<sup>th</sup>, 2022. Results from this study will be presented at scientific  
43 conferences and in peer-reviewed scientific journals.

44 **Trial registration number:** NCT05433831

#### 45 **Strengths and limitations of this study**

##### 46 DRECO strengths

- 47 • Multicentre, prospective, medium-term study in which a large sample (1000  
48 patients) is expected to be recruited.
- 49 • Carried by a senior pool of researchers with wide experience in clinical nutrition and  
50 dietetics.
- 51 • Validation of classical tools and new morpho functional assessment techniques  
52 (ultrasound and bioelectrical impedance) are proposed.

##### 53 DRECO limitations

- 54 • Non-randomized clinical practice study, so it will not be possible to adequately  
55 analyze the effect of nutritional intervention.
- 56 • It is restricted to patients upon hospital discharge, so it cannot be generalized to the  
57 entire population of people at risk of malnutrition.

58 **Keywords:** nutritional ultrasound; nutritional biomarker; ultrasound cut-off values; disease-  
59 related malnutrition; GLIM; SGA; body composition; sarcopenia; quadriceps femoris muscle;  
60 abdominal muscle area, muscle mass.

#### 61 **INTRODUCTION**

62 Disease-related malnutrition (DRM) can occur when there is a deficient supply of energy,  
63 protein and/or other nutrients, depending on the nutritional needs of everyone at different  
64 times of their life cycle or health or disease circumstances. This deficiency induces effects on  
65 body composition and tissue and organ function and results in clinical consequences:  
66 increased morbidity and mortality associated with different disease processes (1).

67 In 2019, the GLIM criteria were published (2), providing a different vision of how to assess  
68 the malnourished patient. These criteria are divided into both phenotypic and etiological  
69 criterion:

##### 70 - Phenotypic criterion

- 71 • Weight loss (%): >5% within past 6 months, or >10% beyond 6 months
- 72 • Low body mass index (kg/m<sup>2</sup>): <20 if < 70 years, or <22 if >70 years. Asia: <18.5 if <  
73 70 years, or <20 if >70 years

- 1  
2  
3 74 ● Reduced muscle mass: Reduced by validated body composition measuring  
4 75 techniques  
5  
6 76 - Etiological criterion  
7  
8 77 ● 50% of ER (energy requirements) > 1 week, or any reduction for >2 weeks, or any  
9 78 chronic GI (gastrointestinal) condition  
10  
11 79 that adversely impacts food assimilation or absorption  
12  
13 80 ● Inflammation: Acute disease/injury or chronic disease-related

14 81 There are techniques for nutritional assessment using assessment tools aimed at morpho  
15 82 functional diagnosis of malnutrition (3), in addition to the classical nutritional parameters, such  
16 83 as weight loss, BMI (body mass index), folds, circumferences, albumin, lymphocytes,  
17 84 cholesterol and intake. New advanced parameters are being incorporated into clinical  
18 85 nutrition and their incorporation into clinical practice is of increasing interest, such as  
19 86 measures derived from bioelectrical impedance (BIA) and phase angle (PhA), dynamometry,  
20 87 functional tests, CRP/prealbumin ratio and muscle ultrasound (see Figure 1).

21 88 Figure 1. Update of nutritional evolution parameters. Reproduced with permission from the  
22 89 authors (3).

23 90 From a scientific point of view, the following nutritional assessment techniques are being  
24 91 incorporated:

#### 25 92 Muscle ultrasound

26 93 The application of ultrasound for the morphological and structural study of muscle mass is an  
27 94 emerging technique. Currently, there are different validation studies on the measurement  
28 95 technique. The ultrasound technique determines the surface area of the muscle in transverse  
29 96 and longitudinal position. With ultrasound analysis, it is possible to measure key parameters  
30 97 of muscle architecture, such as muscle volume and muscle fascicle length. Although there  
31 98 are different muscle structures that can be evaluated, many of the studies focus on the  
32 99 quadriceps rectus femoris or on combinations of various muscle groups involving large  
33 100 muscle bundles with functional importance to the patient in terms of gait. Measurement of the  
34 101 rectus femoris of the quadriceps is one of the most referenced measurements due to its  
35 102 correlation with strength and tests of execution or functional performance. It is necessary to  
36 103 develop new techniques to identify muscle involvement in malnutrition that are valid,  
37 104 standardised, reliable, accurate and profitable. Currently, all definitions of malnutrition include  
38 105 the measurement of muscle mass involvement, however, there is no single way to assess it.  
39 106 The classic imaging techniques such as DEXA (dual-energy x-ray absorptiometry), CT  
40 107 (computerised tomography) and MRI (magnetic resonance imaging) are considered the gold  
41 108 standard, but they have difficulties in their clinical application under normal practice  
42 109 conditions. Ultrasound has the advantage of being inexpensive, portable, and does not  
43 110 involve ionising radiation. Several studies have confirmed the reliability of this technique to

1  
2  
3 111 measure the size of the quadriceps muscle in a healthy population (4). Studies on the  
4 112 reliability of rectus femoris ultrasound have been published with an intraclass coefficient of  
5 113 variation (ICC) of 0.97 (95% CI: 0.92-0.99) for the test-retest reliability of ultrasound.

6  
7  
8 114 The American Society for Parenteral and Enteral Nutrition (ASPEN), among the criteria for  
9 115 the diagnosis of malnutrition in adults, recommends including an evaluation of fat and muscle  
10 116 deposits. Specialists must incorporate techniques that properly help to identify the loss of  
11 117 muscle and fat mass for a correct diagnosis of malnutrition. Implementing these evaluation  
12 118 techniques and instruments is challenging and remains a work in progress (5). Muscle  
13 119 ultrasonography correlates with body composition measurement techniques such as BIA and  
14 120 anthropometry in patients with cancer (6). In adults with cystic fibrosis muscle ultrasound  
15 121 measurements, particularly the mean muscular area rectus anterior (MARA), are related to  
16 122 the nutritional status and respiratory function of these patients. (7)

17  
18  
19 123 The Global Leadership Initiative on Malnutrition (GLIM) has recently appointed a working  
20 124 group to provide consensus-based guidance on assessment of skeletal muscle mass and its  
21 125 role in the malnutrition diagnostic and assessment process. They support the use of US  
22 126 (ultrasound), particularly in settings where its practical applicability provides potential for  
23 127 patient follow-up through repeated measurements, but it requires standardisation through  
24 128 experienced operators, and repeated measurements performed by the same individual. They  
25 129 also encourage further validation studies for the US (8).

### 26 130 Bioelectrical impedance (BIA)

27 131 BIA is used as a tool to obtain data that helps to better understand the patient's nutritional  
28 132 status, being a non-invasive, inexpensive, and easily transportable technique. Vector  
29 133 analysis and phase angle provide direct data, not being necessary to be later adjusted using  
30 134 formulas or mathematical models, as it is needed with simple or multifrequency bioelectrical  
31 135 impedance or multifrequency (9). This method is based on the analysis of the two  
32 136 bioimpedance vectors: resistance (R) and capacitive reactance (Xc). Resistance is defined  
33 137 as the opposition to a flow of electric current through a circuit component, medium, or  
34 138 substance, providing information about biological fluids, and therefore, related to tissue  
35 139 hydration. A decrease in the resistance/height ratio will indicate swelling or third space;  
36 140 conversely, an increased ratio will indicate dehydration. Reactance is the effect on an  
37 141 electrical current caused by a material's ability to store energy in cell membranes, so it is  
38 142 related to the cell mass and the integrity of its membranes. A decrease in Xc indicates loss  
39 143 of cell mass. This cell mass is the sum of all metabolically active cells, being the central  
40 144 parameter in the evaluation of nutritional status since the reduction of cell mass is typically  
41 145 related to malnutrition (10).

42  
43  
44 146 A recent study conducted by Fernandez-Jimenez, *et al* found that a low SPhA (standardised  
45 147 phase angle)-malnutrition value (SPhA < -0.3) was significantly associated with a higher

1  
2  
3 148 mortality hazards ratio (HR 7.87, 95% CI 2.56–24.24,  $p < 0.001$ ). This biological marker could  
4 149 therefore be incorporated among the screening tools and mortality risk assessment in this  
5 150 population (11).

### 8 151 Dynamometry

9 152 Dynamometry is one of the 6 criteria to define malnutrition according to ASPEN (12). It is  
10 153 extremely sensitive to nutritional status changes, so it is particularly useful to track nutritional  
11 154 therapy or interventions results, even in the short and medium term. It has mostly been used  
12 155 to predict post-surgical complications including elderly patients (13). Results obtained are  
13 156 compared to the population averages by age and sex. Sanchez et al (14) presented reference  
14 157 values for hand dynamometry using a Jamar hand dynamometer for a Spanish population,  
15 158 providing cut-off points to define malnutrition. They concluded that hand dynamometry is  
16 159 associated with lean mass, which supports its usefulness in nutritional assessment.

17 160 Although the new GLIM consensus-based guidance on assessment of skeletal muscle mass  
18 161 do not include dynamometry as a marker of muscle mass (8), the authors hereby signing this  
19 162 article have previously studied dynamometry as a marker of muscle mass suggesting that  
20 163 GLIM criterion and dynamometry are associated to a higher mortality rate in both hospitalised  
21 164 and outpatient oncology patients (15, 16).

### 22 165 Functional tests

23 166 These tests are a series of physical activities related to mobility, walking or balance. Their  
24 167 results are related to those of scales that assess instrumental activities of daily living (IADL).  
25 168 The most common are the "Timed Up and Go test" (TUG), the "Gait Speed Test" (GST) and  
26 169 the "Short Physical Performance Battery (SPPB)" test that includes 3 tests (balance, gait  
27 170 speed and get up and walk) (17).

28 171 Besides, the decrease in physical performance, evaluated by the SPPB test or hand grip  
29 172 strength, has been shown to be elevated in patients with colorectal cancer prior to surgery  
30 173 and it was related to an increase in postoperative complications and mortality (18).

### 31 174 **STUDY OBJECTIVES**

32 175 The objective of this study is to value the new muscle ultrasound techniques aimed to  
33 176 measure muscle and functional status, to make a more accurate diagnosis and a better  
34 177 prediction of complications and morbidity and mortality in patients at nutritional risk. This main  
35 178 objective is developed in primary and secondary objectives as it follows:

#### 36 179 **Primary objective**

- 37 180 ● To assess the feasibility of ultrasound or muscle ultrasound techniques in both nutritional  
38 181 diagnosis and follow-up, over 3 to 6 months, in a nutritional intervention programme.

#### 39 182 **Secondary objectives**

- 40 183 ● To determine the association between muscle morphological parameters (nutritional  
41 184 ultrasound of the leg (area, circumference, axis and adipose tissue), total abdominal and



- 185 pre-peritoneal parameters measured by nutritional ultrasound and the nutritional and  
186 functional status of the patient, as well as their prognostic value in hospitalised patients.
- 187 ● To establish an association between ultrasound as a diagnostic value of malnutrition as  
188 compared to the diagnostic gold standard (SGA and GLIM criteria).
  - 189 ● To determine the ultrasound cut-off points associated with the diagnosis of malnutrition  
190 and sarcopenia using the following tools:
    - 191 ○ Measurement of body composition using impedance techniques (Report: Phase  
192 angle, body cell mass (BCM), hydration, fat free mass (FFM) and lean mass index.
    - 193 ○ Muscle strength and capacity to perform physical activity after the intervention:  
194 dynamometry and Timed Up and Go test (TUG).
    - 195 ○ Criteria for sarcopenia.
    - 196 ○ To assess association with inflammatory activity markers: High-sensitivity C-  
197 reactive protein (CRP)/prealbumin.
  - 198 ● To assess ultrasound changes in patient follow-up.
  - 199 ● To establish an association of ultrasound results as predictors of morbidity and mortality  
200 (stay, mortality at 3 and 6 months, readmissions and in-hospital complications).

## 202 **METHODS AND ANALYSIS**

### 203 **Study design and setting**

204 DRECO (Disease-Related caloric-protein malnutrition EChOgraphy) is a prospective,  
205 multicentre, uncontrolled clinical study in standard clinical practice to value the usefulness of  
206 nutritional ultrasound (muscle ultrasound) in the nutritional diagnosis and follow-up of patients  
207 over a period of 3 to 6 consecutive months, after standard nutritional clinical practice  
208 intervention, and physical activity to control their disease-related malnutrition.

209 The study may be considered non-interventional since patients will undergo nutritional  
210 interventions and the standard treatment planned by their physician for treatment according  
211 to his/her standard clinical practice, and the only addition to the standard measurement and  
212 follow-up techniques of the patient will be the performance of a muscle ultrasound  
213 measurement using equipment provided to the centre for this purpose.

### 214 **Patients and public involvement**

215 Patients or the public will not be involved in the design, or conduct, or reporting, or  
216 dissemination plans of our research.

### 217 **Recruitment**

218 Patients over 18 years of age who, in the first week of hospital admission in medical-surgical  
219 areas, excluding critical patients, have an assessment of risk of malnutrition according to the  
220 MUST and SARC-F screening test using R-MAPP. [(MUST: Malnutrition Universal Screening  
221 Tool; SARC-F is an acronym of 5 domains included in the questionnaire: 1) Strength, 2)



222 Assistance with walking, 3) Rising from a chair, 4) Climbing stairs, and 5) Falls; R-MAPP  
223 (Remote consultation on MAInutrition in the Primary Practice)].

224 If the results show a moderate or high risk of malnutrition, these patients will be invited to  
225 participate in the study, and will undergo the morpho functional assessment, an ultrasound  
226 study and the Subjective Global Assessment (SGA). This study is registered under  
227 ClinicalTrials.gov (NCT05433831).

228 Figure 2 shows the schedule of enrolment, interventions, and assessments.

#### 229 **Inclusion criteria**

- 230 ● Patients admitted to hospital who in the first week of admission have moderate or high  
231 risk of malnutrition according to the MUST and SARC-F screening test using R-  
232 MAPP.
- 233 ● Patients aged 18 to 85 years.
- 234 ● Patient who agrees to participate in the study and signs the informed consent.

#### 235 **Exclusion criteria**

- 236 ● Hepatic impairment - AST/ALT (aspartate aminotransferase/alanine  
237 aminotransferase) 3 x upper limit of normal.
- 238 ● Chronic kidney failure - GFR (glomerular filtration rate) <45 mL/min).
- 239 ● Patients with previous ICU (intensive care unit) stay during the study admission.
- 240 ● Cancer patients on palliative treatment or ECOG (Eastern Cooperative Oncology  
241 Group)  $\geq 3$ .
- 242 ● Orthopaedic disease that does not allow adequate walking.
- 243 ● Patients with known dementia or others not related to a significant neurological or  
244 psychiatric disorder, or any other psychological condition that may interfere with the  
245 conduct of the study.
- 246 ● Patients with eating disorders.
- 247 ● Life expectancy of less than 6 months.
- 248 ● Patients unable to adequately complete the clinical laboratory assessments required  
249 for the study protocol.

#### 250 **Sample size calculation**

251 There are no previous clinical trials focusing on this objective published in the literature. We  
252 report a study in patients with chronic kidney disease on haemodialysis (HD) (19) where  
253 measurement of the rectus femoris cross-sectional muscle area (RFCSA) was validated for  
254 the diagnosis of malnutrition related to this condition. RFCSA compared to bioimpedance  
255 spectroscopy had higher area under the curve (AUC, 0.686 vs. 0.581), sensitivity (72.8% vs.  
256 65.8%), and specificity (55.6% vs. 53.9%). The AUC of RFCSA was higher for the risk of  
257 protein-energy wasting (PEW) in male (0.74, 95% CI: 0.66 to 0.82) and female patients (0.80,  
258 95% CI: 0.70 to 0.90) (both  $p < 0.001$ ). Gender-specific RFCSA values (males  $< 6.00$  cm<sup>2</sup>;

259 females <4.47 cm<sup>2</sup>) indicated that HD patients with lower RFCSA were 8 times more likely to  
260 have PEW (AOR = 8.63, 95% CI: 4.80-15.50, p<0.001).

261 Our study aims to establish the feasibility of nutritional ultrasound measurements at different  
262 ages in both sexes to apply to patients with nutritional risk worldwide. For this purpose, the  
263 electronic CRF will be programmed with the sample distributed by quotas to cover 50% men  
264 and 50% women, as well as 10-year age ranges. Age-stratified sampling is designed to obtain  
265 representative results of different ages and could be associated with the results of VGS, BIA,  
266 and dynamometry. Variability of measurements should be adjusted for sex, age and  
267 anthropometric parameters such as height.

268 It is estimated that 1,000 patients with nutritional risk will be discharged from 20-25 healthcare  
269 centres throughout Spain and that at least 60% of the population will complete the 3-to-6-  
270 month follow-up of the study. Due to the special pandemic situation, a higher-than-expected  
271 drop-out rate is expected at 6 months than under normal conditions (40% are estimated not  
272 to complete the 6-month follow-up for any reason).

### 273 **Study conduct**

274 The physicians participating in the study will be responsible for assessing the suitability of  
275 inclusion for each patient.

276 Patients will be consecutively recruited by the physician as they are assessed daily in their  
277 clinical practice at the hospital and found to have a risk of malnutrition according to the  
278 MUST/SARC-F (R-MAPP) screening test.

279 Before inclusion, the investigator must check the inclusion and exclusion criteria and obtain  
280 their informed consent.

281 The physician will be responsible for applying nutritional intervention and physical activity  
282 treatment according to standard clinical practice, as well as for clinical monitoring of patients.  
283 The treatment prescribed to each patient is not the objective of this study and is how the  
284 patient will experience changes that must be recorded with the different techniques described  
285 and with the muscle ultrasound involved in this study.

286 All physicians participating in the study must have been previously trained in the use of the  
287 ultrasound equipment and materials provided for the study, as well as in the use of the  
288 electronic CRF for data entry designed for this study.

289 Nutritional ultrasound techniques and measurements (ultrasound with 4-10 cm linear tube).

290 The equipment provided for the study is UProbe L6C Ultrasound Scanner (linear transducer  
291 7.5-10 kHz) that allows depths up to 100 mm. Manufactured by Guangzhou Sonostar  
292 Technologies Co., Ltd. PR China.

### 293 **Quadriceps rectus femoris ultrasound (see Figure 3)**

294 The measurement technique is determined for the patient lying supine with knees extended  
295 and relaxed.

1  
2  
3 296 Measurement technique:

- 4 297 • In the lower third of the imaginary line between the antero-superior iliac spine and the  
5 superior border of the patella.  
6 298  
7  
8 299 • Correction of leg angle, it is important to focus the image on the rectus femoris.  
9  
10 300 • In malnourished patients, loss of muscle tone causes the muscle to move to the sides  
11 301 • To minimize variability, measurements must be repeated three times.

12 302 Figure 3 – Comparison of longitudinal and transversal sections of the QRF muscle area  
13 ultrasound. Functional measures and main anatomical structures are represented.

14 303  
15 304 **Abdominal ultrasound (see Figure 4)**

16 305 Total, superficial, and pre-peritoneal adipose tissue are measured (centimetres) for the  
17 patient lying down.  
18 306

19 307 Measurement technique:

- 20 308 • The transducer is placed between the xiphoid process and the umbilicus in the midline  
21 (in patients with surgery without navel, this would be 10 cm from the xiphoid  
22 appendix).  
23 309  
24 310  
25 311 • Images are taken during non-forced expiration, in a transverse plane with a variable  
26 probe depth of 4-10 cm, perpendicular to the skin.  
27 312  
28 313 • To minimize variability, measurements must be repeated three times.

29 314 Measurement planes:

- 30 315 • Measurement of subcutaneous adipose tissue: the superficial and deep layers are  
31 differentiated.  
32 316  
33 317 • Visceral adipose tissue measurement: it is measured in a transverse position.  
34 Measure the distance between the boundary of the parietal peritoneum to the *linea*  
35 *alba* on the inner side at the junction of the two-rectus abdominis muscles.  
36 318  
37 319

38 320 Figure 4 - Comparison of longitudinal and transversal sections of the abdominal area  
39 ultrasound. Functional measures and main anatomical structures are represented.  
40 321

41 322 Follow-up period

42 323 The planned follow-up period for each patient will be 3 to 6 months from the inclusion visit.  
43 324 The investigating physician will perform at least one first inclusion visit, and a follow-up visit  
44 at 3 and 6 months for each patient.  
45 325

46 326 Study duration

47 327 The study is planned to last 18 months to detect patients at risk of malnutrition, recruitment,  
48 field work, monitoring and data analysis.  
49 328

50 329 An estimated 2-3 months will be needed to plan the coordination and distribution of the work  
51 in the hospitalisation and outpatient clinic areas for the selection of candidate patients. It will  
52 take 6 to 9 months to recruit patients. From the start of the study, the database will be  
53 completed, and preliminary analyses will be performed. The final analysis will be performed  
54 330  
55 331  
56 332

333 when the follow-up is completed together with writing of the related work that will require 4 to  
334 6 months to complete.

### 335 Outcome measures

336 A list of the outcomes of interest is provided in Table 1.

337

338 Table 1. Study outcomes.

| <b>PRIMARY OUTCOMES</b>                                                     |                                                                                                                                                                                                                                                                                                                                                                                                                                                                                                                                        |
|-----------------------------------------------------------------------------|----------------------------------------------------------------------------------------------------------------------------------------------------------------------------------------------------------------------------------------------------------------------------------------------------------------------------------------------------------------------------------------------------------------------------------------------------------------------------------------------------------------------------------------|
| Nutritional ultrasound measurements: ultrasound with 4-10 cm linear probe * |                                                                                                                                                                                                                                                                                                                                                                                                                                                                                                                                        |
|                                                                             | <ul style="list-style-type: none"> <li>Abdominal ultrasound: total, superficial and pre-peritoneal adipose tissue (measured in centimetres)</li> <li>Muscle ultrasound: Area, circumference, axes and adipose tissue (measured in centimetres)</li> </ul>                                                                                                                                                                                                                                                                              |
| <b>SECONDARY OUTCOMES</b>                                                   |                                                                                                                                                                                                                                                                                                                                                                                                                                                                                                                                        |
| Sociodemographic data:                                                      |                                                                                                                                                                                                                                                                                                                                                                                                                                                                                                                                        |
|                                                                             | <ul style="list-style-type: none"> <li>Age</li> <li>Sex</li> <li>Educational level</li> <li>Toxic habits</li> <li>Medical history</li> <li>Risk of sarcopenia and moderate to high malnutrition based on MUST and SARC-F screening test using R-MAPP</li> </ul>                                                                                                                                                                                                                                                                        |
| Subjective Global Assessment (SGA) questionnaire                            |                                                                                                                                                                                                                                                                                                                                                                                                                                                                                                                                        |
| Anthropometric data:                                                        |                                                                                                                                                                                                                                                                                                                                                                                                                                                                                                                                        |
|                                                                             | <ul style="list-style-type: none"> <li>Current body weight (measured or estimated)</li> <li>Usual weight</li> <li>Adjusted weight (adjusted weight in obese subjects, dry weight without oedema in malnourished subjects)</li> <li>Height (measured or estimated)</li> <li>BMI</li> <li>Arm circumference</li> </ul>                                                                                                                                                                                                                   |
| Bioelectrical impedance data (model (50 kHz): **                            |                                                                                                                                                                                                                                                                                                                                                                                                                                                                                                                                        |
|                                                                             | <ul style="list-style-type: none"> <li>TBW (total body water, L)</li> <li>ECW (extracellular water, L)</li> <li>ICW (intracellular water, L)</li> <li>FFM (lean mass, kg)</li> <li>FM (fat mass, kg)</li> <li>BCM (body cell mass, kg)</li> <li>ASMM (appendicular skeletal muscle mass, kg)</li> <li>SMI (skeletal muscle mass index, kg)</li> <li>Percent hydration</li> <li>Body fat (%)</li> </ul>                                                                                                                                 |
| Blood biochemistry data (at baseline visit, at 3 and 6 months):             |                                                                                                                                                                                                                                                                                                                                                                                                                                                                                                                                        |
|                                                                             | <ul style="list-style-type: none"> <li>Albumin</li> <li>Prealbumin</li> <li>C-reactive protein</li> <li>Total cholesterol</li> <li>Lymphocytes</li> </ul>                                                                                                                                                                                                                                                                                                                                                                              |
| Bioelectrical impedance data (model (50 kHz): **                            |                                                                                                                                                                                                                                                                                                                                                                                                                                                                                                                                        |
|                                                                             | <ul style="list-style-type: none"> <li>Age</li> <li>Sex</li> <li>Educational level</li> <li>Toxic habits</li> <li>Medical history</li> <li>Risk of sarcopenia and moderate to high malnutrition based on MUST and SARC-F screening test using R-MAPP</li> </ul>                                                                                                                                                                                                                                                                        |
| Functional parameters                                                       |                                                                                                                                                                                                                                                                                                                                                                                                                                                                                                                                        |
|                                                                             | <ul style="list-style-type: none"> <li>Timed Up and Go test (TUG): patient sits in a chair and is told to get up (timing starts), walks 3 metres, comes back and sits in the initial chair (timing ends). Interpretation: &lt;20 seconds: normal, &gt; 20 seconds: increased risk of falling.</li> <li>Dynamometry. Three measurements of the dominant hand will be made recording the mean and maximum, measured in kilograms. Jamar® dynamometers are most used in international studies and have several grip positions.</li> </ul> |
| Current patient status                                                      |                                                                                                                                                                                                                                                                                                                                                                                                                                                                                                                                        |

|           |                                                                                                                                                                                                                                    |
|-----------|------------------------------------------------------------------------------------------------------------------------------------------------------------------------------------------------------------------------------------|
|           | <ul style="list-style-type: none"> <li>• Hospital stays, mortality at 3 and 6 months, hospital readmissions and complications, if occurring, and their consequences (resolved/unresolved) must be recorded in the form.</li> </ul> |
| Adherence |                                                                                                                                                                                                                                    |
|           | <ul style="list-style-type: none"> <li>• Attendance to study follow-up visits.</li> </ul>                                                                                                                                          |

\*The equipment provided for the study is the UProbe L6C Ultrasound Scanner (linear transducer 7.5-10 kHz) that allows depths up to 100 mm. Manufactured by Guangzhou Sonostar Technologies Co., Ltd. PR China.

\*\*Each healthcare center could use the BIA device they already owned. The most used device among all participants was AKERN branded.

### 345 **Data analysis plan**

346 Data analysis will be performed using SPSS 22.0 software (SPSS Inc., Chicago, IL, USA).

347 Quantitative variables will be expressed as mean  $\pm$  standard deviation. The comparison  
348 between qualitative variables will be performed using the Chi-square test with Fisher's  
349 correction when necessary. Quantitative variables will be analysed using a Kolmogorov-  
350 Smirnov test. Differences between quantitative variables will be analysed using Student's t  
351 or ANOVA tests (for two or more samples, respectively) and non-parametric tests (Mann-  
352 Whitney or Kruskal-Wallis) will be used when the variables to be analysed do not follow a  
353 normal distribution.

354 Kappa coefficient will be used to assess agreement between techniques in diagnosis of  
355 malnutrition.

356 The association between variables will be studied using Spearman or Pearson correlations  
357 according to normality.

358 Several cut-off points will be estimated for prediction of diagnosis of malnutrition and  
359 sarcopenia using ultrasound by ROC curves.

360 The significant associations between muscle ultrasound parameters and the objective clinical  
361 variables in the univariate analysis will then be analysed in multivariate logistic regression  
362 models which also control other confounding variables. To assess which nutritional tool best  
363 predicts the risk of mortality during admission (and re-admission), we will perform multivariate  
364 logistic regression models, in which the dependent variable will be in-hospital mortality (or re-  
365 admission) based on the different tools applied (e.g. ultrasound, phase angle, SGA criteria,  
366 GLIM, LMI), also controlling for sex, the presence of previous comorbidities and other  
367 variables showing association in the univariate study.

368 For all calculations, a probability p less than 0.05 for two tails will be considered significant.

### 369 Recording of adverse reactions

370 Adverse reactions reporting is not the objective of the study. The investigator should proceed  
371 as usual and through the channels established in the healthcare system if any adverse effect  
372 occurs during follow-up. It will only be recorded in the follow-up if the patient must leave the  
373 study for this reason for statistical purposes.

1  
2  
3 374 Handling of missing data

4 375 No formal imputation will be made for the different analyses; therefore, all estimates will be  
5  
6 376 obtained using all available data (available data only, ADO).

7  
8 377 Since the study will be recorded using an electronic CRF (case report form), the necessary  
9  
10 378 consistency filters and alerts for missing data will be programmed to validate and store the  
11  
12 379 information, to minimise missing data and prevent the entry of incorrect or out of range data.

13 380 **ETHICS**

14 381 **General aspects**

15 382 This study will be conducted in accordance with current regulations, accepted international  
16  
17 383 ethical standards of Good Clinical Practice (CPMP/ICH/135/95), the principles laid down in  
18  
19 384 the latest version of the Declaration of Helsinki, RD 1591/2009 and Circular No. 07/2004  
20  
21 385 regulating clinical research with medical devices.

22 386 **Informed consent**

23 387 Before inclusion in the study and after considering the suitability of patient inclusion, all  
24  
25 388 participating physicians must offer the patient information about the study using a patient  
26  
27 389 information sheet, invite the patient to participate in it, answer their questions and request  
28  
29 390 completion of the informed consent form that will be kept in their own file.

30 391 **Evaluation by an Ethics Committee**

31 392 All DRECO study materials have been approved by each of the IRB/IEC of all the sites  
32  
33 393 enrolled (either approval of the own IRB/IEC or validating the approval of the IRB/IEC of  
34  
35 394 another hospital).

36 395 **Confidentiality**

37 396 The study data will be entered into an automated file owned by the sponsor. The analysis of  
38  
39 397 study results will be made from an anonymised database, that is, dissociated, with no  
40  
41 398 personal data, so that no subject can be identified or identifiable. This study database will be  
42  
43 399 extracted from the electronic CRF and will include data from physician records, impedance  
44  
45 400 recordings, and muscle ultrasound images. Data from different sources will be linked from  
46  
47 401 the patient code and will not include personal data. All data in the file owned by the sponsor  
48  
49 402 will be treated confidentially. The sponsor undertakes not to transfer data to third parties.

49 403 **Dissemination**

50 404 Results from this study will be presented at international and national scientific conferences,  
51  
52 405 and in peer-reviewed scientific journals.

53 406 **DISCUSSION**

54  
55 407 There is a growing interest in the literature on the evaluation of muscle mass by ultrasound  
56  
57 408 (20). Its current clinical utility focuses on measuring the involvement of muscle mass to  
58  
59 409 assess the nutritional status of a patient (21). The further step that it is being investigated in  
60  
410 this clinical study, is that muscle ultrasound becomes not only a tool to assess the diagnosis



1  
2  
3 411 of malnutrition but to integrate it in the routine clinical practices to evaluate nutritional  
4 412 interventions.

6 413 The evaluation of the nutritional ultrasound should enable clinical decisions based on its  
7  
8 414 results to permit the adjustment and individualization of the nutritional therapeutic and  
9  
10 415 physical exercise plan, along with functional recovery (20).

11 416 To the best of our knowledge, this is going to be the largest study (sample size=1,000) using  
12  
13 417 nutritional ultrasound in patients with nutritional risk. Current scientific evidence is limited,  
14  
15 418 and it is expected that such a large population will allow us to validate and define specific cut-  
16  
17 419 off values for nutritional ultrasound and get its correlation with already well-known nutritional  
18 420 tools such as SGA or GLIM criteria (22).

19 421 The emerging field of ultrasound assessment of muscle mass only highlights the need for a  
20  
21 422 standardisation of measurement technique as Perkisas, *et al* outline in their recently  
22  
23 423 published 2022 SARCUS update. This update provides the approach of muscle assessment  
24  
25 424 according to the most recent literature and anatomical landmarks for 39 different muscles.  
26  
27 425 Besides, the discussion about 4 new muscle parameters that are added to the 5 that were  
28  
29 426 previously considered is also presented (23) and some of these parameters have been  
30  
31 427 correlated with PhA (24) and they will be analysed in our present protocol. Our ongoing study  
32  
33 428 is intended to standardize these outstanding technique measures, to apply this technique  
34  
35 429 widely soon.

36 430 **Author Contributions:** All authors have identified the research question and were  
37  
38 431 responsible for the conception and design of the protocol and the study. JM.G.A., D.B. D.L.R,  
39  
40 432 and G.O. are conducting study investigation. G.G.R has managed funding acquisition. All  
41  
42 433 authors have been involved in drafting the manuscript and revising it critically for intellectual  
43  
44 434 content. All authors read and approved the final manuscript.

45 435 **Funding:** This study will be conducted thanks to a research grant from Abbott Laboratories.

46 436 **Conflicts of Interest:** JM.G.A., D.B. D.L.R, and G.O declare no conflict of interest. G.G.R is  
47  
48 437 an employee of Abbott Laboratories.

49 438 **Institutional Review Board Statement:** The study was conducted in accordance with the  
50  
51 439 Declaration of Helsinki, and approved by the following Ethical Committees: Comité de Ética  
52  
53 440 de la Investigación Provincial De Málaga, Portal de Ética de la Investigación Biomédica de  
54  
55 441 Andalucía (PEIBA), Comité de Ética de la Investigación con medicamentos Área De Salud  
56  
57 442 Valladolid, Comité de Ética de la Investigación con medicamentos Hospital Universitario La  
58  
59 443 Paz, Comité de Ética de la Investigación con medicamentos Hospital Universitario 12 de  
60  
444 Octubre, Comité de Ética de la Investigación con medicamentos Hospital General  
445  
446 Universitario Gregorio Marañón, Comité de Ética de la Investigación con medicamentos del  
Complejo Hospitalario Universitario de Canarias (Provincia de Santa Cruz de Tenerife),



1  
2  
3 447 Comité de Ética de la Investigación con medicamentos del Complejo Hospitalario  
4 448 Universitario de Las Palmas, Comité de Ética de la Investigación con medicamentos y  
5 449 Comisión de Proyectos de Investigación del Hospital Universitari Vall d'Hebron, Comité de  
6 450 Ética de la Investigación con medicamentos del Consorcio Hospital General Universitario de  
7 451 Valencia, Comité de Ética de la Investigación con medicamentos de la Clínica de Navarra,  
8 452 Comité de Ética de la Investigación con medicamentos del Hospital de Basurto and Comité  
9 453 de Ética de la Investigación con Medicamentos del Hospital Universitario y Politécnico la Fe  
10 454 de Valencia. This study is registered at clinicaltrials.gov (NCT05433831), registered on June  
11 455 27th, 2022. <https://clinicaltrials.gov/ct2/show/NCT05433831>.

12  
13  
14  
15  
16  
17  
18 456 **Informed Consent Statement:** All participants are provided with a participant information  
19 457 sheet and are required to provide written consent.

20  
21 458

## 22 23 459 REFERENCES

- 24  
25 460 1. Soeters PB, Reijven PLM, van Bokhorst-de van der Schueren MAE, Schols JMGA,  
26 461 Halfens RJG, Meijers JMM, et al. A rational approach to nutritional assessment. *Clin Nutr*  
27 462 *Edinb Scotl.* octubre de 2008;27(5):706-16.
- 28 463 2. Jensen GL, Cederholm T, Correia MITD, Gonzalez MC, Fukushima R, Higashiguchi T,  
29 464 et al. GLIM Criteria for the Diagnosis of Malnutrition: A Consensus Report From the  
30 465 Global Clinical Nutrition Community. *J Parenter Enter Nutr.* enero de 2019;43(1):32-40.
- 31 466 3. García Almeida JM, García García C, Bellido Castañeda V, Bellido Guerrero D. New  
32 467 approach to nutrition. Assessment of the patient's nutritional status: function and body  
33 468 composition. *Nutr Hosp [Internet].* 4 September 2018 [cited 12 July 2020];35(3).  
34 469 Available in: <http://revista.nutricionhospitalaria.net/index.php/nh/article/view/2027>
- 35 470 4. Kyle UG, Bosaeus I, De Lorenzo AD, Deurenberg P, Elia M, Gómez JM, et al.  
36 471 Bioelectrical impedance analysis--part I: review of principles and methods. *Clin Nutr*  
37 472 *Edinb Scotl.* octubre de 2004;23(5):1226-43.
- 38 473 5. Norman K, Stobäus N, Pirlich M, Bösy-Westphal A. Bioelectrical phase angle and  
39 474 impedance vector analysis--clinical relevance and applicability of impedance  
40 475 parameters. *Clin Nutr Edinb Scotl.* diciembre de 2012;31(6):854-61.
- 41 476 6. López-Gómez, J.J.; Benito-Sendín Plaar, K.; Izaola-Jauregui, O.; Primo-Martín, D.;  
42 477 Gómez-Hoyos, E.; Torres-Torres, B.; De Luis-Román, D.A. Muscular Ultrasonography  
43 478 in Morphofunctional Assessment of Patients with Oncological Pathology at Risk of  
44 479 Malnutrition. *Nutrients* 2022, 14, 1573.
- 45 480 7. Sánchez-Torralvo FJ, Porrás N, Ruiz-García I, Maldonado-Araque C, García-Olivares  
46 481 M, Girón MV, Gonzalo-Marín M, Oliveira C, Oliveira G. Usefulness of Muscle

- 1  
2  
3 482 Ultrasonography in the Nutritional Assessment of Adult Patients with Cystic Fibrosis.  
4 483 *Nutrients*. 2022 Aug 17;14(16):3377. doi: 10.3390/nu14163377. PMID: 36014883;  
5 484 PMCID: PMC9415857.
- 6  
7  
8 485 8. Compher C, Cederholm T, Correia MITD, Gonzalez MC, Higashiguch T, Shi HP, Bischoff  
9 486 SC, Boirie Y, Carrasco F, Cruz-Jentoft A, Fuchs-Tarlovsky V, Fukushima R, Heymsfield  
10 487 SB, Mourtzakis M, Muscaritoli M, Norman K, Nyulasi I, Pisprasert V, Prado CM, de van  
11 488 der Schuren M, Yoshida S, Yu Y, Jensen G, Barazzoni R. Guidance for assessment of  
12 489 the muscle mass phenotypic criterion for the Global Leadership Initiative on Malnutrition  
13 490 diagnosis of malnutrition. *JPEN J Parenter Enteral Nutr*. 2022 Apr 19. doi:  
14 491 10.1002/jpen.2366. Epub ahead of print. PMID: 35437785.
- 15  
16  
17  
18  
19 492 9. Ní Bhuachalla ÉB, Daly LE, Power DG, Cushen SJ, MacEneaney P, Ryan AM.  
20 493 Computed tomography diagnosed cachexia and sarcopenia in 725 oncology patients: is  
21 494 nutritional screening capturing hidden malnutrition? Is nutritional screening capturing  
22 495 hidden malnutrition in oncology patients? *J Cachexia Sarcopenia Muscle*. abril de  
23 496 2018;9(2):295-305.
- 24  
25  
26  
27 497 10. Van der Werf A, Langius J a. E, de van der Schueren M a. E, Nurmohamed SA, van der  
28 498 Pant K a. MI, Blauwhoff-Buskermolen S, et al. Percentiles for skeletal muscle index, area  
29 499 and radiation attenuation based on computed tomography imaging in a healthy  
30 500 Caucasian population. *Eur J Clin Nutr*. 2018;72(2):288-96.
- 31  
32  
33 501 11. Fernández-Jiménez R, Dalla-Rovere L, García-Olivares M, et al. Phase Angle and  
34 502 Handgrip Strength as a Predictor of Disease-Related Malnutrition in Admitted Patients:  
35 503 12-Month Mortality. *Nutrients*. 2022;14(9):1851. Published 2022 Apr 28.
- 36  
37  
38 504 12. White JV, Guenter P, Jensen G, Malone A, Schofield M; Academy Malnutrition Work  
39 505 Group; ASPEN Malnutrition Task Force; ASPEN Board of Directors. Consensus  
40 506 statement: Academy of Nutrition and Dietetics and American Society for Parenteral and  
41 507 Enteral Nutrition: characteristics recommended for the identification and documentation  
42 508 of adult malnutrition (undernutrition). *JPEN J Parenter Enteral Nutr* 2012;36(3):275-83
- 43  
44  
45  
46 509 13. Barata AT, Santos C, Cravo M, Vinhas M do C, Morais C, Carolino E, et al. Handgrip  
47 510 Dynamometry and Patient-Generated Subjective Global Assessment in Patients with  
48 511 Nonresectable Lung Cancer. *Nutr Cancer*. 2017;69(1):154-8.
- 49  
50  
51 512 14. Sánchez Torralvo FJ, Porrás N, Abuín Fernández J, García Torres F, Tapia MJ, Lima F,  
52 513 et al. Normative reference values for hand grip dynamometry in Spain. Association with  
53 514 lean mass. *Nutr Hosp* 2018;35:98-103
- 54  
55  
56  
57 515 15. Sánchez-Torralvo FJ, González-Poveda I, García-Olivares M, Porrás N, Gonzalo-Marín  
58 516 M, Tapia MJ, Mera-Velasco S, Toval-Mata JA, Ruiz-López M, Carrasco-Campos J,  
59 517 Santoyo-Santoyo J, Oliveira G. Poor Physical Performance Is Associated with
- 60

- 1  
2  
3 518 Postoperative Complications and Mortality in Preoperative Patients with Colorectal  
4 519 Cancer. *Nutrients*. 2022 Apr 2;14(7):1484.
- 5  
6 520 16. Contreras-Bolívar V, Sánchez-Torralvo FJ, Ruiz-Vico M, González-Almendros I, Barrios  
7 521 M, Padín S, Alba E, Oliveira G. GLIM Criteria Using Hand Grip Strength Adequately  
8 522 Predict Six-Month Mortality in Cancer Inpatients. *Nutrients*. 2019 Sep 1;11(9):2043.
- 9  
10 523 17. Podsiadlo D, Richardson S. The timed «Up & Go»: a test of basic functional mobility for  
11 524 frail elderly persons. *J Am Geriatr Soc*. febrero de 1991;39(2):142-8.
- 12  
13 525 18. Sánchez-Torralvo FJ, González-Poveda I, García-Olivares M, Porrás N, Gonzalo-Marín  
14 526 M, Tapia MJ, Mera-Velasco S, Toval-Mata JA, Ruiz-López M, Carrasco-Campos J,  
15 527 Santoyo-Santoyo J, Oliveira G. Poor Physical Performance Is Associated with  
16 528 Postoperative Complications and Mortality in Preoperative Patients with Colorectal  
17 529 Cancer. *Nutrients*. 2022 Apr 2;14(7):1484.
- 18  
19 530 19. Sahathevan S, Khor BH, Singh BKS, Sabatino A, Fiaccadori E, Daud ZAM, Ali MS,  
20 531 Narayanan SS, Tallman D, Chinna K, Goh BL, Gafor AHA, Ahmad G, Morad Z, Khosla  
21 532 P, Karupaiah T, On Behalf Of The Patch Study Malaysia Investigators. Association of  
22 533 Ultrasound-Derived Metrics of the Quadriceps Muscle with Protein Energy Wasting in  
23 534 Hemodialysis Patients: A Multicenter Cross-Sectional Study. *Nutrients*. 2020 Nov  
24 535 23;12(11):3597. doi: 10.3390/nu12113597.
- 25  
26 536 20. J.M. García-Almeida, C. García-García, I.M. Vegas-Aguilar et al., Nutritional  
27 537 ultrasound®: Conceptualisation, technical considerations and standardisation,  
28 538 *Endocrinología, Diabetes y Nutrición*, <https://doi.org/10.1016/j.endinu.2022.03.008>
- 29  
30 539 21. Connolly B, MacBean V, Crowley C, Lunt A, Moxham J, Rafferty GF, et al. Ultrasound  
31 540 for the assessment of peripheral skeletal muscle architecture in critical illness: a  
32 541 systematic review. *Crit Care Med*. 2015;43:897-905.
- 33  
34 542 22. Huo Z, Chong F, Yin L, Lu Z, Liu J, Xu H. Accuracy of the GLIM criteria for diagnosing  
35 543 malnutrition: A systematic review and meta-analysis. *Clin Nutr*. 2022 Jun;41(6):1208-  
36 544 1217. doi: 10.1016/j.clnu.2022.04.005. Epub 2022 Apr 11. PMID: 35504163)
- 37  
38 545 23. Perkisas S, Bastijns S, Baudry S, Bauer J, Beaudart C, Beckwée D, Cruz-Jentoft A,  
39 546 Gasowski J, Hobbelen H, Jager-Wittenaar H, Kasiukiewicz A, Landi F, Malek M, Marco  
40 547 E, Martone AM, de Miguel AM, Piotrowicz K, Sanchez E, Sanchez-Rodriguez D,  
41 548 Scafoglieri A, Vandewoude M, Verhoeven V, Wojszel ZB, De Cock AM. Application of  
42 549 ultrasound for muscle assessment in sarcopenia: 2020 SARCUS update. *Eur Geriatr  
43 550 Med*. 2021 Feb;12(1):45-59. doi: 10.1007/s41999-020-00433-9. Epub 2021 Jan 2. PMID:  
44 551 33387359.
- 45  
46 552 24. Primo D, Izaola O, Gómez JJJ, de Luis D. Correlation of the Phase Angle with Muscle  
47 553 Ultrasound and Quality of Life in Obese Females. *Dis Markers*. 2022 Aug  
48 554 9;2022:7165126. doi: 10.1155/2022/7165126. PMID: 35983408; PMCID: PMC9381286.

1  
2  
3  
4  
5  
6  
7  
8  
9  
10  
11  
12  
13  
14  
15  
16  
17  
18  
19  
20  
21  
22  
23  
24  
25  
26  
27  
28  
29  
30  
31  
32  
33  
34  
35  
36  
37  
38  
39  
40  
41  
42  
43  
44  
45  
46  
47  
48  
49  
50  
51  
52  
53  
54  
55  
56  
57  
58  
59  
60

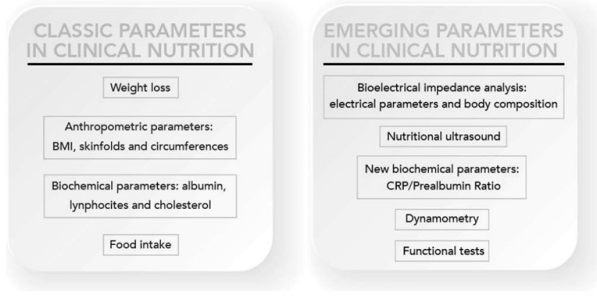

Figure 1. Update of nutritional evolution parameters. Reproduced with permission from the authors  
338x190mm (96 x 96 DPI)

1  
2  
3  
4  
5  
6  
7  
8  
9  
10  
11  
12  
13  
14  
15  
16  
17  
18  
19  
20  
21  
22  
23  
24  
25  
26  
27  
28  
29  
30  
31  
32  
33  
34  
35  
36  
37  
38  
39  
40  
41  
42  
43  
44  
45  
46  
47  
48  
49  
50  
51  
52  
53  
54  
55  
56  
57  
58  
59  
60

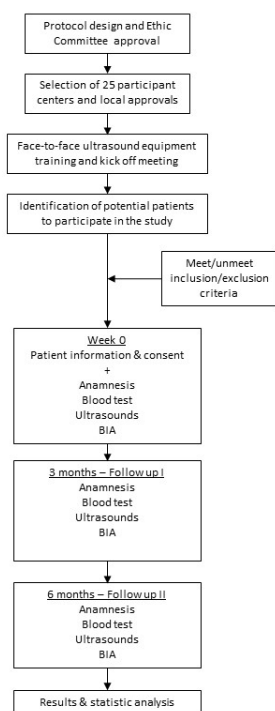

Figure 2 shows the schedule of enrolment, interventions, and assessments.

190x338mm (96 x 96 DPI)

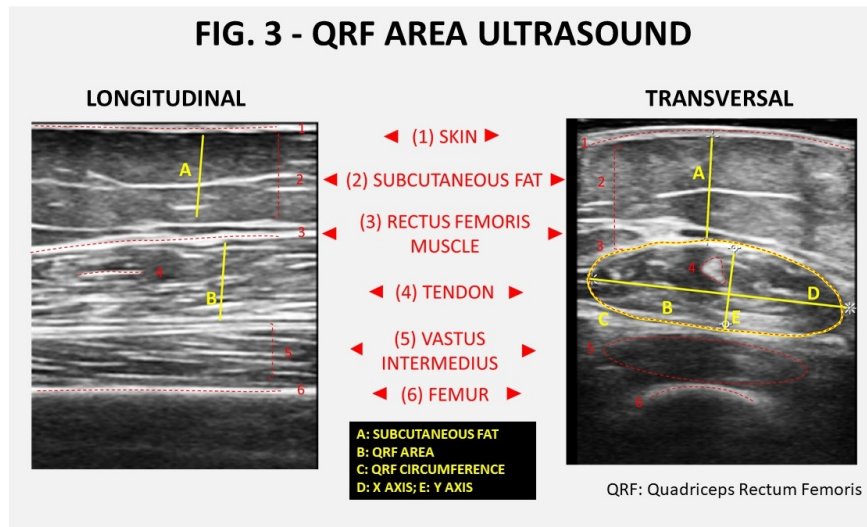

Figure 3 – Comparison of longitudinal and transversal sections of the QRF muscle area ultrasound. Functional measures and main anatomical structures are represented.

338x190mm (96 x 96 DPI)

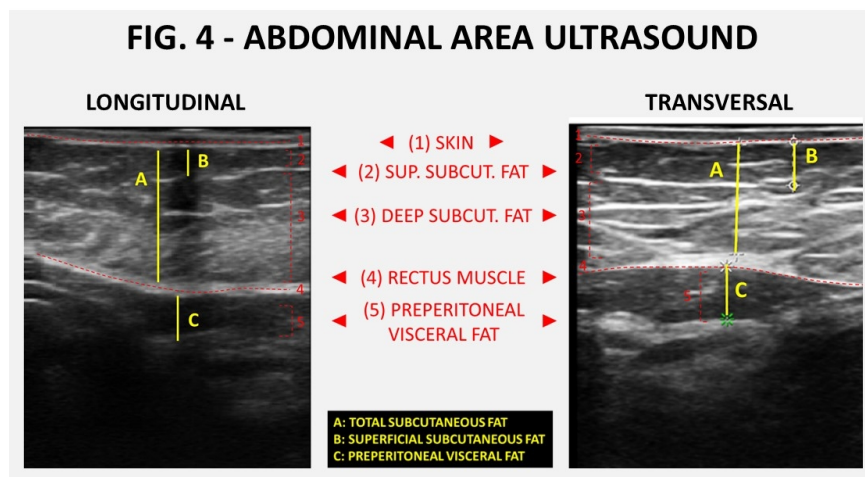

25 Figure 4 - Comparison of longitudinal and transversal sections of the QRF muscle area ultrasound. Functional  
26 measures and main anatomical structures are represented.

27 338x190mm (96 x 96 DPI)



# Reporting checklist for protocol of a clinical trial.

Based on the SPIRIT guidelines.

## Instructions to authors

Complete this checklist by entering the page numbers from your manuscript where readers will find each of the items listed below.

Your article may not currently address all the items on the checklist. Please modify your text to include the missing information. If you are certain that an item does not apply, please write "n/a" and provide a short explanation.

Upload your completed checklist as an extra file when you submit to a journal.

In your methods section, say that you used the SPIRIT reporting guidelines, and cite them as:

Chan A-W, Tetzlaff JM, Gøtzsche PC, Altman DG, Mann H, Berlin J, Dickersin K, Hróbjartsson A, Schulz KF, Parulekar WR, Krleža-Jerić K, Laupacis A, Moher D. SPIRIT 2013 Explanation and Elaboration: Guidance for protocols of clinical trials. *BMJ*. 2013;346:e7586

|                                   | Reporting Item                                                                                                         | Page Number |
|-----------------------------------|------------------------------------------------------------------------------------------------------------------------|-------------|
| <b>Administrative information</b> |                                                                                                                        |             |
| Title                             | <u>#1</u> Descriptive title identifying the study design, population, interventions, and, if applicable, trial acronym | 1           |

|                                                                                  |                                                                  |                     |                                                                                                                                                                                                                                                                                          |       |
|----------------------------------------------------------------------------------|------------------------------------------------------------------|---------------------|------------------------------------------------------------------------------------------------------------------------------------------------------------------------------------------------------------------------------------------------------------------------------------------|-------|
| 1<br>2<br>3<br>4<br>5<br>6                                                       | Trial registration                                               | <a href="#">#2a</a> | Trial identifier and registry name. If not yet registered, name of intended registry                                                                                                                                                                                                     | 2     |
| 7<br>8<br>9<br>10<br>11                                                          | Trial registration:<br>data set                                  | <a href="#">#2b</a> | All items from the World Health Organization Trial Registration Data Set                                                                                                                                                                                                                 | 2     |
| 12<br>13<br>14                                                                   | Protocol version                                                 | <a href="#">#3</a>  | Date and version identifier                                                                                                                                                                                                                                                              | NA    |
| 15<br>16<br>17<br>18<br>19                                                       | Funding                                                          | <a href="#">#4</a>  | Sources and types of financial, material, and other support                                                                                                                                                                                                                              | 12    |
| 20<br>21<br>22<br>23<br>24<br>25<br>26<br>27                                     | Roles and<br>responsibilities:<br>contributorship                | <a href="#">#5a</a> | Names, affiliations, and roles of protocol contributors                                                                                                                                                                                                                                  | 1; 12 |
| 28<br>29<br>30<br>31<br>32<br>33<br>34<br>35<br>36<br>37                         | Roles and<br>responsibilities:<br>sponsor contact<br>information | <a href="#">#5b</a> | Name and contact information for the trial sponsor                                                                                                                                                                                                                                       | 1     |
| 38<br>39<br>40<br>41<br>42<br>43<br>44<br>45<br>46<br>47<br>48<br>49<br>50<br>51 | Roles and<br>responsibilities:<br>sponsor and funder             | <a href="#">#5c</a> | Role of study sponsor and funders, if any, in study design; collection, management, analysis, and interpretation of data; writing of the report; and the decision to submit the report for publication, including whether they will have ultimate authority over any of these activities | 1;12  |
| 52<br>53<br>54<br>55<br>56<br>57<br>58<br>59<br>60                               | Roles and<br>responsibilities:<br>committees                     | <a href="#">#5d</a> | Composition, roles, and responsibilities of the coordinating centre, steering committee, endpoint adjudication committee, data management team,                                                                                                                                          | 1;12  |

and other individuals or groups overseeing the trial, if applicable (see Item 21a for data monitoring committee)

## Introduction

|                                                 |                     |                                                                                                                                                                                                            |     |
|-------------------------------------------------|---------------------|------------------------------------------------------------------------------------------------------------------------------------------------------------------------------------------------------------|-----|
| Background and rationale                        | <a href="#">#6a</a> | Description of research question and justification for undertaking the trial, including summary of relevant studies (published and unpublished) examining benefits and harms for each intervention         | 1-5 |
| Background and rationale: choice of comparators | <a href="#">#6b</a> | Explanation for choice of comparators                                                                                                                                                                      | NA  |
| Objectives                                      | <a href="#">#7</a>  | Specific objectives or hypotheses                                                                                                                                                                          | 5-6 |
| Trial design                                    | <a href="#">#8</a>  | Description of trial design including type of trial (eg, parallel group, crossover, factorial, single group), allocation ratio, and framework (eg, superiority, equivalence, non-inferiority, exploratory) |     |

## Methods:

Participants, interventions, and outcomes

|                                                                |                                    |                      |                                                                                                                                                                                                  |                         |
|----------------------------------------------------------------|------------------------------------|----------------------|--------------------------------------------------------------------------------------------------------------------------------------------------------------------------------------------------|-------------------------|
| 1<br>2<br>3<br>4<br>5<br>6<br>7<br>8<br>9                      | Study setting                      | <a href="#">#9</a>   | Description of study settings (eg, community clinic, academic hospital) and list of countries where data will be collected. Reference to where list of study sites can be obtained               | 6-7                     |
| 10<br>11<br>12<br>13<br>14<br>15<br>16<br>17<br>18<br>19<br>20 | Eligibility criteria               | <a href="#">#10</a>  | Inclusion and exclusion criteria for participants. If applicable, eligibility criteria for study centres and individuals who will perform the interventions (eg, surgeons, psychotherapists)     | 7                       |
| 21<br>22<br>23<br>24<br>25<br>26<br>27                         | Interventions:<br>description      | <a href="#">#11a</a> | Interventions for each group with sufficient detail to allow replication, including how and when they will be administered                                                                       | 8                       |
| 28<br>29<br>30<br>31<br>32<br>33<br>34<br>35<br>36<br>37       | Interventions:<br>modifications    | <a href="#">#11b</a> | Criteria for discontinuing or modifying allocated interventions for a given trial participant (eg, drug dose change in response to harms, participant request, or improving / worsening disease) | NO DRUG<br>INTERVENTION |
| 38<br>39<br>40<br>41<br>42<br>43<br>44<br>45<br>46<br>47       | Interventions:<br>adherence        | <a href="#">#11c</a> | Strategies to improve adherence to intervention protocols, and any procedures for monitoring adherence (eg, drug tablet return; laboratory tests)                                                | NO DRUG<br>INTERVENTION |
| 48<br>49<br>50<br>51<br>52                                     | Interventions:<br>concomitant care | <a href="#">#11d</a> | Relevant concomitant care and interventions that are permitted or prohibited during the trial                                                                                                    | NA                      |
| 53<br>54<br>55<br>56<br>57<br>58<br>59<br>60                   | Outcomes                           | <a href="#">#12</a>  | Primary, secondary, and other outcomes, including the specific measurement variable (eg,                                                                                                         | 10 – TABLE 1            |

1 systolic blood pressure), analysis metric (eg,  
 2 change from baseline, final value, time to event),  
 3 method of aggregation (eg, median, proportion),  
 4 and time point for each outcome. Explanation of  
 5 the clinical relevance of chosen efficacy and harm  
 6 outcomes is strongly recommended  
 7  
 8  
 9  
 10  
 11  
 12

|    |                           |                                                                                                                                                                                                                       |              |
|----|---------------------------|-----------------------------------------------------------------------------------------------------------------------------------------------------------------------------------------------------------------------|--------------|
| 13 |                           |                                                                                                                                                                                                                       |              |
| 14 |                           |                                                                                                                                                                                                                       |              |
| 15 | Participant timeline      | <a href="#">#13</a> Time schedule of enrolment, interventions<br>(including any run-ins and washouts),<br>assessments, and visits for participants. A<br>schematic diagram is highly recommended (see<br>Figure)      | 7 – FIGURE 2 |
| 16 |                           |                                                                                                                                                                                                                       |              |
| 17 |                           |                                                                                                                                                                                                                       |              |
| 18 |                           |                                                                                                                                                                                                                       |              |
| 19 |                           |                                                                                                                                                                                                                       |              |
| 20 |                           |                                                                                                                                                                                                                       |              |
| 21 |                           |                                                                                                                                                                                                                       |              |
| 22 |                           |                                                                                                                                                                                                                       |              |
| 23 |                           |                                                                                                                                                                                                                       |              |
| 24 |                           |                                                                                                                                                                                                                       |              |
| 25 |                           |                                                                                                                                                                                                                       |              |
| 26 |                           |                                                                                                                                                                                                                       |              |
| 27 | Sample size               | <a href="#">#14</a> Estimated number of participants needed to<br>achieve study objectives and how it was<br>determined, including clinical and statistical<br>assumptions supporting any sample size<br>calculations | 7-8          |
| 28 |                           |                                                                                                                                                                                                                       |              |
| 29 |                           |                                                                                                                                                                                                                       |              |
| 30 |                           |                                                                                                                                                                                                                       |              |
| 31 |                           |                                                                                                                                                                                                                       |              |
| 32 |                           |                                                                                                                                                                                                                       |              |
| 33 |                           |                                                                                                                                                                                                                       |              |
| 34 |                           |                                                                                                                                                                                                                       |              |
| 35 |                           |                                                                                                                                                                                                                       |              |
| 36 |                           |                                                                                                                                                                                                                       |              |
| 37 |                           |                                                                                                                                                                                                                       |              |
| 38 |                           |                                                                                                                                                                                                                       |              |
| 39 | Recruitment               | <a href="#">#15</a> Strategies for achieving adequate participant<br>enrolment to reach target sample size                                                                                                            | 7-8          |
| 40 |                           |                                                                                                                                                                                                                       |              |
| 41 |                           |                                                                                                                                                                                                                       |              |
| 42 |                           |                                                                                                                                                                                                                       |              |
| 43 |                           |                                                                                                                                                                                                                       |              |
| 44 | <b>Methods:</b>           |                                                                                                                                                                                                                       | NO           |
| 45 |                           |                                                                                                                                                                                                                       |              |
| 46 | <b>Assignment of</b>      |                                                                                                                                                                                                                       | CONTROLLED   |
| 47 |                           |                                                                                                                                                                                                                       |              |
| 48 | <b>interventions (for</b> |                                                                                                                                                                                                                       | TRIAL        |
| 49 |                           |                                                                                                                                                                                                                       |              |
| 50 | <b>controlled trials)</b> |                                                                                                                                                                                                                       |              |
| 51 |                           |                                                                                                                                                                                                                       |              |
| 52 |                           |                                                                                                                                                                                                                       |              |
| 53 |                           |                                                                                                                                                                                                                       |              |
| 54 |                           |                                                                                                                                                                                                                       |              |
| 55 |                           |                                                                                                                                                                                                                       |              |
| 56 |                           |                                                                                                                                                                                                                       |              |
| 57 |                           |                                                                                                                                                                                                                       |              |
| 58 |                           |                                                                                                                                                                                                                       |              |
| 59 |                           |                                                                                                                                                                                                                       |              |
| 60 |                           |                                                                                                                                                                                                                       |              |

|    |                     |                      |                                                       |    |
|----|---------------------|----------------------|-------------------------------------------------------|----|
| 1  | Allocation:         | <a href="#">#16a</a> | Method of generating the allocation sequence          | NA |
| 2  |                     |                      |                                                       |    |
| 3  | sequence            |                      | (eg, computer-generated random numbers), and          |    |
| 4  |                     |                      |                                                       |    |
| 5  | generation          |                      | list of any factors for stratification. To reduce     |    |
| 6  |                     |                      |                                                       |    |
| 7  |                     |                      | predictability of a random sequence, details of       |    |
| 8  |                     |                      |                                                       |    |
| 9  |                     |                      | any planned restriction (eg, blocking) should be      |    |
| 10 |                     |                      |                                                       |    |
| 11 |                     |                      | provided in a separate document that is               |    |
| 12 |                     |                      |                                                       |    |
| 13 |                     |                      | unavailable to those who enrol participants or        |    |
| 14 |                     |                      |                                                       |    |
| 15 |                     |                      | assign interventions                                  |    |
| 16 |                     |                      |                                                       |    |
| 17 | Allocation          | <a href="#">#16b</a> | Mechanism of implementing the allocation              | NA |
| 18 |                     |                      |                                                       |    |
| 19 | concealment         |                      | sequence (eg, central telephone; sequentially         |    |
| 20 |                     |                      |                                                       |    |
| 21 | mechanism           |                      | numbered, opaque, sealed envelopes),                  |    |
| 22 |                     |                      |                                                       |    |
| 23 |                     |                      | describing any steps to conceal the sequence          |    |
| 24 |                     |                      |                                                       |    |
| 25 |                     |                      | until interventions are assigned                      |    |
| 26 |                     |                      |                                                       |    |
| 27 | Allocation:         | <a href="#">#16c</a> | Who will generate the allocation sequence, who        | NA |
| 28 |                     |                      |                                                       |    |
| 29 | implementation      |                      | will enrol participants, and who will assign          |    |
| 30 |                     |                      |                                                       |    |
| 31 |                     |                      | participants to interventions                         |    |
| 32 |                     |                      |                                                       |    |
| 33 | Blinding (masking)  | <a href="#">#17a</a> | Who will be blinded after assignment to               | NA |
| 34 |                     |                      |                                                       |    |
| 35 |                     |                      | interventions (eg, trial participants, care           |    |
| 36 |                     |                      |                                                       |    |
| 37 |                     |                      | providers, outcome assessors, data analysts),         |    |
| 38 |                     |                      |                                                       |    |
| 39 |                     |                      | and how                                               |    |
| 40 |                     |                      |                                                       |    |
| 41 | Blinding (masking): | <a href="#">#17b</a> | If blinded, circumstances under which unblinding      | NA |
| 42 |                     |                      |                                                       |    |
| 43 | emergency           |                      | is permissible, and procedure for revealing a         |    |
| 44 |                     |                      |                                                       |    |
| 45 | unblinding          |                      | participant's allocated intervention during the trial |    |
| 46 |                     |                      |                                                       |    |
| 47 |                     |                      |                                                       |    |
| 48 |                     |                      |                                                       |    |
| 49 |                     |                      |                                                       |    |
| 50 |                     |                      |                                                       |    |
| 51 |                     |                      |                                                       |    |
| 52 |                     |                      |                                                       |    |
| 53 |                     |                      |                                                       |    |
| 54 |                     |                      |                                                       |    |
| 55 |                     |                      |                                                       |    |
| 56 |                     |                      |                                                       |    |
| 57 |                     |                      |                                                       |    |
| 58 |                     |                      |                                                       |    |
| 59 |                     |                      |                                                       |    |
| 60 |                     |                      |                                                       |    |

**Methods: Data****collection,****management, and****analysis**

|                                 |                      |                                                                                                                                                                                                                                                                                                                                                                                                              |    |
|---------------------------------|----------------------|--------------------------------------------------------------------------------------------------------------------------------------------------------------------------------------------------------------------------------------------------------------------------------------------------------------------------------------------------------------------------------------------------------------|----|
| Data collection plan            | <a href="#">#18a</a> | Plans for assessment and collection of outcome, baseline, and other trial data, including any related processes to promote data quality (eg, duplicate measurements, training of assessors) and a description of study instruments (eg, questionnaires, laboratory tests) along with their reliability and validity, if known. Reference to where data collection forms can be found, if not in the protocol | 10 |
| Data collection plan: retention | <a href="#">#18b</a> | Plans to promote participant retention and complete follow-up, including list of any outcome data to be collected for participants who discontinue or deviate from intervention protocols                                                                                                                                                                                                                    | 9  |
| Data management                 | <a href="#">#19</a>  | Plans for data entry, coding, security, and storage, including any related processes to promote data quality (eg, double data entry; range checks for data values). Reference to where details of data management procedures can be found, if not in the protocol                                                                                                                                            | 10 |



|    |                        |                      |                                                   |           |
|----|------------------------|----------------------|---------------------------------------------------|-----------|
| 1  | Statistics: outcomes   | <a href="#">#20a</a> | Statistical methods for analysing primary and     | 10        |
| 2  |                        |                      | secondary outcomes. Reference to where other      |           |
| 3  |                        |                      | details of the statistical analysis plan can be   |           |
| 4  |                        |                      | found, if not in the protocol                     |           |
| 5  |                        |                      |                                                   |           |
| 6  |                        |                      |                                                   |           |
| 7  |                        |                      |                                                   |           |
| 8  |                        |                      |                                                   |           |
| 9  |                        |                      |                                                   |           |
| 10 |                        |                      |                                                   |           |
| 11 | Statistics: additional | <a href="#">#20b</a> | Methods for any additional analyses (eg,          | 10        |
| 12 | analyses               |                      | subgroup and adjusted analyses)                   |           |
| 13 |                        |                      |                                                   |           |
| 14 |                        |                      |                                                   |           |
| 15 |                        |                      |                                                   |           |
| 16 | Statistics: analysis   | <a href="#">#20c</a> | Definition of analysis population relating to     | 10        |
| 17 | population and         |                      | protocol non-adherence (eg, as randomised         |           |
| 18 | missing data           |                      | analysis), and any statistical methods to handle  |           |
| 19 |                        |                      | missing data (eg, multiple imputation)            |           |
| 20 |                        |                      |                                                   |           |
| 21 |                        |                      |                                                   |           |
| 22 |                        |                      |                                                   |           |
| 23 |                        |                      |                                                   |           |
| 24 |                        |                      |                                                   |           |
| 25 |                        |                      |                                                   |           |
| 26 | <b>Methods:</b>        |                      |                                                   | <b>NA</b> |
| 27 |                        |                      |                                                   |           |
| 28 | <b>Monitoring</b>      |                      |                                                   |           |
| 29 |                        |                      |                                                   |           |
| 30 |                        |                      |                                                   |           |
| 31 |                        |                      |                                                   |           |
| 32 | Data monitoring:       | <a href="#">#21a</a> | Composition of data monitoring committee          |           |
| 33 | formal committee       |                      | (DMC); summary of its role and reporting          |           |
| 34 |                        |                      | structure; statement of whether it is independent |           |
| 35 |                        |                      | from the sponsor and competing interests; and     |           |
| 36 |                        |                      | reference to where further details about its      |           |
| 37 |                        |                      | charter can be found, if not in the protocol.     |           |
| 38 |                        |                      | Alternatively, an explanation of why a DMC is not |           |
| 39 |                        |                      | needed                                            |           |
| 40 |                        |                      |                                                   |           |
| 41 |                        |                      |                                                   |           |
| 42 |                        |                      |                                                   |           |
| 43 |                        |                      |                                                   |           |
| 44 |                        |                      |                                                   |           |
| 45 |                        |                      |                                                   |           |
| 46 |                        |                      |                                                   |           |
| 47 |                        |                      |                                                   |           |
| 48 |                        |                      |                                                   |           |
| 49 |                        |                      |                                                   |           |
| 50 |                        |                      |                                                   |           |
| 51 | Data monitoring:       | <a href="#">#21b</a> | Description of any interim analyses and stopping  |           |
| 52 | interim analysis       |                      | guidelines, including who will have access to     |           |
| 53 |                        |                      | these interim results and make the final decision |           |
| 54 |                        |                      | to terminate the trial                            |           |
| 55 |                        |                      |                                                   |           |
| 56 |                        |                      |                                                   |           |
| 57 |                        |                      |                                                   |           |
| 58 |                        |                      |                                                   |           |
| 59 |                        |                      |                                                   |           |
| 60 |                        |                      |                                                   |           |

|    |                      |                      |                                                      |    |
|----|----------------------|----------------------|------------------------------------------------------|----|
| 1  | Harms                | <a href="#">#22</a>  | Plans for collecting, assessing, reporting, and      |    |
| 2  |                      |                      | managing solicited and spontaneously reported        |    |
| 3  |                      |                      | adverse events and other unintended effects of       |    |
| 4  |                      |                      | trial interventions or trial conduct                 |    |
| 5  |                      |                      |                                                      |    |
| 6  |                      |                      |                                                      |    |
| 7  |                      |                      |                                                      |    |
| 8  |                      |                      |                                                      |    |
| 9  |                      |                      |                                                      |    |
| 10 |                      |                      |                                                      |    |
| 11 | Auditing             | <a href="#">#23</a>  | Frequency and procedures for auditing trial          |    |
| 12 |                      |                      | conduct, if any, and whether the process will be     |    |
| 13 |                      |                      | independent from investigators and the sponsor       |    |
| 14 |                      |                      |                                                      |    |
| 15 |                      |                      |                                                      |    |
| 16 |                      |                      |                                                      |    |
| 17 |                      |                      |                                                      |    |
| 18 |                      |                      |                                                      |    |
| 19 | <b>Ethics and</b>    |                      |                                                      |    |
| 20 |                      |                      |                                                      |    |
| 21 | <b>dissemination</b> |                      |                                                      |    |
| 22 |                      |                      |                                                      |    |
| 23 |                      |                      |                                                      |    |
| 24 | Research ethics      | <a href="#">#24</a>  | Plans for seeking research ethics committee /        | 11 |
| 25 |                      |                      | institutional review board (REC / IRB) approval      |    |
| 26 | approval             |                      |                                                      |    |
| 27 |                      |                      |                                                      |    |
| 28 |                      |                      |                                                      |    |
| 29 | Protocol             | <a href="#">#25</a>  | Plans for communicating important protocol           | 11 |
| 30 |                      |                      | modifications (eg, changes to eligibility criteria,  |    |
| 31 | amendments           |                      | outcomes, analyses) to relevant parties (eg,         |    |
| 32 |                      |                      | investigators, REC / IRBs, trial participants, trial |    |
| 33 |                      |                      | registries, journals, regulators)                    |    |
| 34 |                      |                      |                                                      |    |
| 35 |                      |                      |                                                      |    |
| 36 |                      |                      |                                                      |    |
| 37 |                      |                      |                                                      |    |
| 38 |                      |                      |                                                      |    |
| 39 |                      |                      |                                                      |    |
| 40 |                      |                      |                                                      |    |
| 41 |                      |                      |                                                      |    |
| 42 | Consent or assent    | <a href="#">#26a</a> | Who will obtain informed consent or assent from      | 13 |
| 43 |                      |                      | potential trial participants or authorised           |    |
| 44 |                      |                      | surrogates, and how (see Item 32)                    |    |
| 45 |                      |                      |                                                      |    |
| 46 |                      |                      |                                                      |    |
| 47 |                      |                      |                                                      |    |
| 48 |                      |                      |                                                      |    |
| 49 | Consent or assent:   | <a href="#">#26b</a> | Additional consent provisions for collection and     | NA |
| 50 |                      |                      | use of participant data and biological specimens     |    |
| 51 | ancillary studies    |                      | in ancillary studies, if applicable                  |    |
| 52 |                      |                      |                                                      |    |
| 53 |                      |                      |                                                      |    |
| 54 |                      |                      |                                                      |    |
| 55 |                      |                      |                                                      |    |
| 56 |                      |                      |                                                      |    |
| 57 |                      |                      |                                                      |    |
| 58 |                      |                      |                                                      |    |
| 59 |                      |                      |                                                      |    |
| 60 |                      |                      |                                                      |    |

|    |                       |                      |                                                        |    |
|----|-----------------------|----------------------|--------------------------------------------------------|----|
| 1  | Confidentiality       | <a href="#">#27</a>  | How personal information about potential and           | 11 |
| 2  |                       |                      | enrolled participants will be collected, shared, and   |    |
| 3  |                       |                      | maintained in order to protect confidentiality         |    |
| 4  |                       |                      | before, during, and after the trial                    |    |
| 5  |                       |                      |                                                        |    |
| 6  |                       |                      |                                                        |    |
| 7  |                       |                      |                                                        |    |
| 8  |                       |                      |                                                        |    |
| 9  |                       |                      |                                                        |    |
| 10 |                       |                      |                                                        |    |
| 11 | Declaration of        | <a href="#">#28</a>  | Financial and other competing interests for            | 12 |
| 12 | interests             |                      | principal investigators for the overall trial and      |    |
| 13 |                       |                      | each study site                                        |    |
| 14 |                       |                      |                                                        |    |
| 15 |                       |                      |                                                        |    |
| 16 |                       |                      |                                                        |    |
| 17 |                       |                      |                                                        |    |
| 18 |                       |                      |                                                        |    |
| 19 | Data access           | <a href="#">#29</a>  | Statement of who will have access to the final trial   | 11 |
| 20 |                       |                      | dataset, and disclosure of contractual                 |    |
| 21 |                       |                      | agreements that limit such access for                  |    |
| 22 |                       |                      | investigators                                          |    |
| 23 |                       |                      |                                                        |    |
| 24 |                       |                      |                                                        |    |
| 25 |                       |                      |                                                        |    |
| 26 |                       |                      |                                                        |    |
| 27 |                       |                      |                                                        |    |
| 28 |                       |                      |                                                        |    |
| 29 | Ancillary and post    | <a href="#">#30</a>  | Provisions, if any, for ancillary and post-trial care, | NA |
| 30 | trial care            |                      | and for compensation to those who suffer harm          |    |
| 31 |                       |                      | from trial participation                               |    |
| 32 |                       |                      |                                                        |    |
| 33 |                       |                      |                                                        |    |
| 34 |                       |                      |                                                        |    |
| 35 |                       |                      |                                                        |    |
| 36 | Dissemination         | <a href="#">#31a</a> | Plans for investigators and sponsor to                 | 11 |
| 37 | policy: trial results |                      | communicate trial results to participants,             |    |
| 38 |                       |                      | healthcare professionals, the public, and other        |    |
| 39 |                       |                      | relevant groups (eg, via publication, reporting in     |    |
| 40 |                       |                      | results databases, or other data sharing               |    |
| 41 |                       |                      | arrangements), including any publication               |    |
| 42 |                       |                      | restrictions                                           |    |
| 43 |                       |                      |                                                        |    |
| 44 |                       |                      |                                                        |    |
| 45 |                       |                      |                                                        |    |
| 46 |                       |                      |                                                        |    |
| 47 |                       |                      |                                                        |    |
| 48 |                       |                      |                                                        |    |
| 49 |                       |                      |                                                        |    |
| 50 |                       |                      |                                                        |    |
| 51 |                       |                      |                                                        |    |
| 52 |                       |                      |                                                        |    |
| 53 | Dissemination         | <a href="#">#31b</a> | Authorship eligibility guidelines and any intended     | NA |
| 54 | policy: authorship    |                      | use of professional writers                            |    |
| 55 |                       |                      |                                                        |    |
| 56 |                       |                      |                                                        |    |
| 57 |                       |                      |                                                        |    |
| 58 |                       |                      |                                                        |    |
| 59 |                       |                      |                                                        |    |
| 60 |                       |                      |                                                        |    |

1 Dissemination [#31c](#) Plans, if any, for granting public access to the full NA  
 2  
 3 policy: reproducible protocol, participant-level dataset, and statistical  
 4  
 5 research code  
 6  
 7

## 8 Appendices

9  
 10  
 11  
 12 Informed consent [#32](#) Model consent form and other related NA  
 13  
 14 materials documentation given to participants and  
 15  
 16 authorised surrogates  
 17  
 18

19  
 20 Biological [#33](#) Plans for collection, laboratory evaluation, and NA  
 21  
 22 specimens storage of biological specimens for genetic or  
 23  
 24 molecular analysis in the current trial and for  
 25  
 26 future use in ancillary studies, if applicable  
 27  
 28

29  
 30 None The SPIRIT Explanation and Elaboration paper is distributed under the terms of the Creative  
 31  
 32 Commons Attribution License CC-BY-NC. This checklist can be completed online using  
 33  
 34 <https://www.goodreports.org/>, a tool made by the [EQUATOR Network](#) in collaboration with  
 35  
 36 [Penelope.ai](#)  
 37  
 38  
 39  
 40  
 41  
 42  
 43  
 44  
 45  
 46  
 47  
 48  
 49  
 50  
 51  
 52  
 53  
 54  
 55  
 56  
 57  
 58  
 59  
 60

# BMJ Open

**Protocol for a prospective cohort study on the feasibility of application of nutritional ultrasound in the diagnosis and follow-up of patients with nutritional risk at hospital discharge: Study on body composition and function (DRECO).**

|                                 |                                                                                                                                                                                                                                                                                                                                                                                                                                                                  |
|---------------------------------|------------------------------------------------------------------------------------------------------------------------------------------------------------------------------------------------------------------------------------------------------------------------------------------------------------------------------------------------------------------------------------------------------------------------------------------------------------------|
| Journal:                        | <i>BMJ Open</i>                                                                                                                                                                                                                                                                                                                                                                                                                                                  |
| Manuscript ID                   | bmjopen-2023-074945.R1                                                                                                                                                                                                                                                                                                                                                                                                                                           |
| Article Type:                   | Protocol                                                                                                                                                                                                                                                                                                                                                                                                                                                         |
| Date Submitted by the Author:   | 20-Oct-2023                                                                                                                                                                                                                                                                                                                                                                                                                                                      |
| Complete List of Authors:       | García Almeida, José Manuel; Hospital Universitario Virgen de la Victoria, Department of Endocrinology and Nutrition<br>Bellido, Diego; Complejo Hospitalario de Ferrol, Department of Endocrinology and Nutrition<br>De Luis, D.A; Valladolid University Hospital, Department of Endocrinology and Nutrition<br>Guzmán Rolo, Germán ; Abbot Laboratories<br>Olveira, Gabriel; Regional University Hospital of Málaga, Department of Endocrinology and Nutrition |
| <b>Primary Subject Heading</b>: | Nutrition and metabolism                                                                                                                                                                                                                                                                                                                                                                                                                                         |
| Secondary Subject Heading:      | Nutrition and metabolism                                                                                                                                                                                                                                                                                                                                                                                                                                         |
| Keywords:                       | NUTRITION & DIETETICS, Ultrasound < RADIOLOGY & IMAGING, Nutritional support < GASTROENTEROLOGY                                                                                                                                                                                                                                                                                                                                                                  |
|                                 |                                                                                                                                                                                                                                                                                                                                                                                                                                                                  |

SCHOLARONE™  
Manuscripts

1  
2  
3  
4  
5  
6  
7  
8  
9  
10  
11  
12  
13  
14  
15  
16  
17  
18  
19  
20  
21  
22  
23  
24  
25  
26  
27  
28  
29  
30  
31  
32  
33  
34  
35  
36  
37  
38  
39  
40  
41  
42  
43  
44  
45  
46  
47  
48  
49  
50  
51  
52  
53  
54  
55  
56  
57  
58  
59  
60

1 **Protocol for a prospective cohort study on the feasibility of application of nutritional**  
2 **ultrasound in the diagnosis and follow-up of patients with nutritional risk at hospital**  
3 **discharge: Study on body composition and function (DRECO).**

4 José Manuel García Almeida<sup>a\*</sup>, Diego Bellido<sup>b</sup>, Daniel de Luis Román<sup>c\*\*</sup>, Germán Guzmán  
5 Rolo<sup>d</sup> and Gabriel Oliveira<sup>e</sup>

6 a) *Department of Endocrinology and Nutrition, Hospital Universitario Virgen de la Victoria, IBIMA, CIBEROBN, Hospital Quirónsalud,*  
7 *University of Málaga, Spain; jgarciaalmeida@gmail.com*

8 b) *Department of Endocrinology and Nutrition, Complejo Hospitalario de Ferrol, A Coruña, Spain; diegobellido@gmail.com*

9 c) *Department of Endocrinology and Nutrition, Institute of Endocrinology and Nutrition, Medicine School and Department of Endocrinology and Investigation,*

10 d) *Medical department. Abbott Laboratories. Spain; german.guzman1@abbott.com*

11 e) *Department of Endocrinology and Nutrition. Regional University Hospital of Málaga. University of Málaga. IBIMA BIONAND Platform*  
12 *of Málaga, Spain; gabrielm.oliveira.sspa@juntadeandalucia.es*

13 *\*Corresponding author. Dr. José Manuel García Almeida. Department of Endocrinology and Nutrition, Hospital Universitario Virgen de la Victoria,*  
14 *IBIMA, CIBEROBN, Hospital Quirónsalud, University of Málaga, Spain; jgarciaalmeida@gmail.com. Campus de Teatinos s/n, 29010, Málaga. +34*  
15 *646314182*

16 *\*\*Corresponding author. Dr. Daniel de Luis Román. Department of Endocrinology and Nutrition, Institute of Endocrinology and Nutrition, Medicine*  
17 *School and Department of Endocrinology and Investigation, Hospital Clínico Universitario, University of Valladolid, C/Los perales16, Simancas*  
18 *47130, Valladolid, Spain; dadluis@yahoo.es*

21 **ABSTRACT**

22 **Introduction:** Nutritional ultrasound is an emerging technique in clinical nutrition for the  
23 morphological and structural study of muscle mass. Currently, all definitions of malnutrition  
24 include the measurement of muscle mass, however, there is no single way to assess it. It is  
25 necessary to develop new techniques to identify muscle involvement in malnutrition that are  
26 valid, standardized, reliable, accurate and profitable.

27 **Objective:** To value the new muscle ultrasound techniques aimed to measure muscle and  
28 functional status, to make a more accurate diagnosis and a better prediction of complications  
29 and morbidity and mortality in patients at nutritional risk. Primary outcome: to assess the  
30 feasibility of ultrasound or muscle ultrasound techniques in both nutritional diagnosis and  
31 follow-up in a nutritional intervention program.

32 **Methods and analysis:** DRECO (Disease-Related caloric-protein malnutrition EChOgraphy)  
33 is a prospective, multicenter (25 Spanish hospitals), uncontrolled clinical study in standard  
34 clinical practice to value the usefulness of nutritional ultrasound (muscle ultrasound) in the  
35 nutritional diagnosis and follow-up, over 3 to 6 months, after standard nutritional clinical

36 practice intervention and physical activity, to control their disease-related malnutrition. 1000  
37 patients are expected to be included in.

38 **Discussion:** This study will standardize nutritional ultrasound measures. It will validate and  
39 define specific cut-off values for nutritional ultrasound and correlate it with already well-known  
40 nutritional tools such as SGA (Subjective Global Assessment) or GLIM (Global Leadership  
41 Initiative on Malnutrition) criteria. Thus, muscle ultrasound will become not only a tool to  
42 diagnose malnutrition, but it will be integrated in the daily practice to evaluate nutritional  
43 interventions.

44 **Ethics and dissemination Ethical:** All DRECO study materials have been approved by each  
45 of the IRB/IEC of all the sites enrolled (either approval of the own IRB/IEC or validating the  
46 approval of the IRB/IEC of another hospital). The study has been registered with  
47 ClinicalTrials.gov, on June 27<sup>th</sup>, 2022. Results from this study will be presented at scientific  
48 conferences and in peer-reviewed scientific journals.

49 **Trial registration number:** NCT05433831

#### 50 **Strengths and limitations of this study**

##### 51 DRECO strengths

- 52 • Multicentre, prospective, medium-term study in which a large sample (1000  
53 patients) is expected to be recruited.
- 54 • First study designed as a real-world study to evaluate the feasibility of nutritional  
55 ultrasound, led by senior researchers wide experienced in clinical nutrition.
- 56 • Validation of classical tools and new morpho functional assessment techniques  
57 (ultrasound and bioelectrical impedance) are proposed.

##### 58 DRECO limitations

- 59 • Non-randomized clinical practice study, so it will not be possible to adequately  
60 analyze the effect of nutritional intervention.
- 61 • It is restricted to patients upon hospital discharge, so it cannot be generalized to the  
62 entire population of people at risk of malnutrition.

63 **Keywords:** nutritional ultrasound; nutritional biomarker; ultrasound cut-off values; disease-  
64 related malnutrition; GLIM; SGA; body composition; sarcopenia; quadriceps femoris muscle;  
65 abdominal muscle area, muscle mass.

## 66 **1. INTRODUCTION**

67 Disease-related malnutrition (DRM) can occur when there is a deficient supply of energy,  
68 protein and/or other nutrients, depending on the nutritional needs of everyone at different  
69 times of their life cycle or health or disease circumstances. This deficiency induces effects on  
70 body composition and tissue and organ function and results in clinical consequences:  
71 increased morbidity and mortality associated with different disease processes (1).

1  
2  
3 72 In 2019, the GLIM criteria were published (2), providing a different vision of how to assess  
4 73 the malnourished patient. These criteria are divided into both phenotypic and etiological  
5 74 criterion:

6 75 - Phenotypic criterion

- 7 76
- 8 77 • Weight loss (%): >5% within past 6 months, or >10% beyond 6 months
  - 9 78 • Low body mass index (kg/m<sup>2</sup>): <20 if < 70 years, or <22 if >70 years. Asia: <18.5 if <  
10 79 70 years, or <20 if >70 years
  - 11 80 • Reduced muscle mass: Reduced by validated body composition measuring  
12 81 techniques

13 82 - Etiological criterion

- 14 83 • 50% of ER (energy requirements) > 1 week, or any reduction for >2 weeks, or any  
15 84 chronic GI (gastrointestinal) condition  
16 85 that adversely impacts food assimilation or absorption
- 17 86 • Inflammation: Acute disease/injury or chronic disease-related

18 87 There are techniques for nutritional assessment using assessment tools aimed at morpho  
19 88 functional diagnosis of malnutrition (3), in addition to the classical nutritional parameters, such  
20 89 as weight loss, BMI (body mass index), folds, circumferences, albumin, lymphocytes,  
21 90 cholesterol and intake. New advanced parameters are being incorporated into clinical  
22 91 nutrition and their incorporation into clinical practice is of increasing interest, such as  
23 92 measures derived from bioelectrical impedance (BIA) and phase angle (PhA), dynamometry,  
24 93 functional tests, CRP/prealbumin ratio and muscle ultrasound (see Figure 1).

25 94 Figure 1. Update of nutritional evolution parameters. Reproduced with permission from the  
26 95 authors (3).

27 96 From a scientific point of view, the following nutritional assessment techniques are being  
28 97 incorporated:

29 98 Muscle ultrasound

30 99 The application of ultrasound for the morphological and structural study of muscle mass is an  
31 100 emerging technique. Currently, there are different validation studies on the measurement  
32 101 technique. The ultrasound technique determines the surface area of the muscle in transverse  
33 102 and longitudinal position. With ultrasound analysis, it is possible to measure key parameters  
34 103 of muscle architecture, such as muscle volume and muscle fascicle length. Although there  
35 104 are different muscle structures that can be evaluated, many of the studies focus on the  
36 105 quadriceps rectus femoris or on combinations of various muscle groups involving large  
37 106 muscle bundles with functional importance to the patient in terms of gait. Measurement of the  
38 107 rectus femoris of the quadriceps is one of the most referenced measurements due to its  
39 108 correlation with strength and tests of execution or functional performance. It is necessary to  
40 develop new techniques to identify muscle involvement in malnutrition that are valid,



1  
2  
3 109 standardised, reliable, accurate and profitable. Currently, all definitions of malnutrition include  
4 110 the measurement of muscle mass involvement, however, there is no single way to assess it.  
5  
6 111 The classic imaging techniques such as DEXA (dual-energy x-ray absorptiometry), CT  
7 112 (computerised tomography) and MRI (magnetic resonance imaging) are considered the gold  
8  
9 113 standard, but they have difficulties in their clinical application under normal practice  
10 114 conditions. Ultrasound has the advantage of being inexpensive, portable, and does not  
11 115 involve ionising radiation. Several studies have confirmed the reliability of this technique to  
12 116 measure the size of the quadriceps muscle in a healthy population (4). Studies on the  
13 117 reliability of rectus femoris ultrasound have been published with an intraclass coefficient of  
14 118 variation (ICC) of 0.97 (95% CI: 0.92-0.99) for the test-retest reliability of ultrasound.

15  
16 119 The American Society for Parenteral and Enteral Nutrition (ASPEN), among the criteria for  
17 120 the diagnosis of malnutrition in adults, recommends including an evaluation of fat and muscle  
18 121 deposits. Specialists must incorporate techniques that properly help to identify the loss of  
19 122 muscle and fat mass for a correct diagnosis of malnutrition. Implementing these evaluation  
20 123 techniques and instruments is challenging and remains a work in progress (5). Muscle  
21 124 ultrasonography correlates with body composition measurement techniques such as BIA and  
22 125 anthropometry in patients with cancer (6). In adults with cystic fibrosis muscle ultrasound  
23 126 measurements, particularly the mean muscular area rectus anterior (MARA), are related to  
24 127 the nutritional status and respiratory function of these patients. (7)

25  
26 128 The Global Leadership Initiative on Malnutrition (GLIM) has recently appointed a working  
27 129 group to provide consensus-based guidance on assessment of skeletal muscle mass and its  
28 130 role in the malnutrition diagnostic and assessment process. They support the use of US  
29 131 (ultrasound), particularly in settings where its practical applicability provides potential for  
30 132 patient follow-up through repeated measurements, but it requires standardisation through  
31 133 experienced operators, and repeated measurements performed by the same individual. They  
32 134 also encourage further validation studies for the US (8).

#### 33 135 Bioelectrical impedance (BIA)

34  
35 136 BIA is used as a tool to obtain data that helps to better understand the patient's nutritional  
36 137 status, being a non-invasive, inexpensive, and easily transportable technique. Vector  
37 138 analysis and phase angle provide direct data, not being necessary to be later adjusted using  
38 139 formulas or mathematical models, as it is needed with simple or multifrequency bioelectrical  
39 140 impedance or multifrequency (9). This method is based on the analysis of the two  
40 141 bioimpedance vectors: resistance (R) and capacitive reactance (Xc). Resistance is defined  
41 142 as the opposition to a flow of electric current through a circuit component, medium, or  
42 143 substance, providing information about biological fluids, and therefore, related to tissue  
43 144 hydration. A decrease in the resistance/height ratio will indicate swelling or third space;  
44 145 conversely, an increased ratio will indicate dehydration. Reactance is the effect on an

1  
2  
3 146 electrical current caused by a material's ability to store energy in cell membranes, so it is  
4 147 related to the cell mass and the integrity of its membranes. A decrease in Xc indicates loss  
5 148 of cell mass. This cell mass is the sum of all metabolically active cells, being the central  
6 149 parameter in the evaluation of nutritional status since the reduction of cell mass is typically  
7 150 related to malnutrition (10).

8 151 A recent study conducted by Fernandez-Jimenez, *et al* found that a low SPhA (standardised  
9 152 phase angle)-malnutrition value (SPhA < -0.3) was significantly associated with a higher  
10 153 mortality hazards ratio (HR 7.87, 95% CI 2.56–24.24,  $p < 0.001$ ). This biological marker could  
11 154 therefore be incorporated among the screening tools and mortality risk assessment in this  
12 155 population (11).

### 13 156 Dynamometry

14 157 Dynamometry is one of the 6 criteria to define malnutrition according to ASPEN (12). It is  
15 158 extremely sensitive to nutritional status changes, so it is particularly useful to track nutritional  
16 159 therapy or interventions results, even in the short and medium term. It has mostly been used  
17 160 to predict post-surgical complications including elderly patients (13). Results obtained are  
18 161 compared to the population averages by age and sex. Sanchez et al (14) presented reference  
19 162 values for hand dynamometry using a Jamar hand dynamometer for a Spanish population,  
20 163 providing cut-off points to define malnutrition. They concluded that hand dynamometry is  
21 164 associated with lean mass, which supports its usefulness in nutritional assessment.

22 165 Although the new GLIM consensus-based guidance on assessment of skeletal muscle mass  
23 166 do not include dynamometry as a marker of muscle mass (8), the authors hereby signing this  
24 167 article have previously studied dynamometry as a marker of muscle mass suggesting that  
25 168 GLIM criterion and dynamometry are associated to a higher mortality rate in both hospitalised  
26 169 and outpatient oncology patients (15, 16).

### 27 170 Functional tests

28 171 These tests are a series of physical activities related to mobility, walking or balance. Their  
29 172 results are related to those of scales that assess instrumental activities of daily living (IADL).  
30 173 The most common are the "Timed Up and Go test" (TUG), the "Gait Speed Test" (GST) and  
31 174 the "Short Physical Performance Battery (SPPB)" test that includes 3 tests (balance, gait  
32 175 speed and get up and walk) (17).

33 176 Besides, the decrease in physical performance, evaluated by the SPPB test or hand grip  
34 177 strength, has been shown to be elevated in patients with colorectal cancer prior to surgery  
35 178 and it was related to an increase in postoperative complications and mortality (18).

## 36 179 **1.1. STUDY OBJECTIVES**

37 180 The objective of this study is to value the new muscle ultrasound techniques aimed to  
38 181 measure muscle and functional status, to make a more accurate diagnosis and a better  
39  
40  
41  
42  
43  
44  
45  
46  
47  
48  
49  
50  
51  
52  
53  
54  
55  
56  
57  
58  
59  
60

1  
2  
3 182 prediction of complications and morbidity and mortality in patients at nutritional risk. This main  
4 183 objective is developed in primary and secondary objectives as it follows:

5  
6 184 **1.1.1. Primary objective**

- 7  
8 185 ● To assess the feasibility of ultrasound or muscle ultrasound techniques in both nutritional  
9 186 diagnosis and follow-up, over 3 to 6 months, in a nutritional intervention programme.

10  
11 187 **1.1.2. Secondary objectives**

- 12 188 ● To determine the association between muscle morphological parameters (nutritional  
13 189 ultrasound of the leg (area, circumference, axis and adipose tissue), total abdominal and  
14 190 pre-peritoneal parameters measured by nutritional ultrasound and the nutritional and  
15 191 functional status of the patient, as well as their prognostic value in hospitalised patients.  
16 192 ● To establish an association between ultrasound as a diagnostic value of malnutrition as  
17 193 compared to the diagnostic gold standard (SGA and GLIM criteria).  
18 194 ● To determine the ultrasound cut-off points associated with the diagnosis of malnutrition  
19 195 and sarcopenia using the following tools:  
20 196 ○ Measurement of body composition using impedance techniques (Report: Phase  
21 197 angle, body cell mass (BCM), hydration, fat free mass (FFM) and lean mass index.  
22 198 ○ Muscle strength and capacity to perform physical activity after the intervention:  
23 199 dynamometry and Timed Up and Go test (TUG).  
24 200 ○ Criteria for sarcopenia.  
25 201 ○ To assess association with inflammatory activity markers: High-sensitivity C-  
26 202 reactive protein (CRP)/prealbumin.  
27 203 ● To assess ultrasound changes in patient follow-up.  
28 204 ● To establish an association of ultrasound results as predictors of morbidity and mortality  
29 205 (stay, mortality at 3 and 6 months, readmissions and in-hospital complications).

30  
31 206 **2. PATIENT PARTICIPANT INVOLVEMENT AND FEASIBILITY OF STUDY DESIGN**

32 207 DRECO (Disease-Related caloric-protein malnutrition EChOgraphy) is a prospective,  
33 208 multicentre, uncontrolled clinical study in standard clinical practice to value the usefulness of  
34 209 nutritional ultrasound (muscle ultrasound) in the nutritional diagnosis and follow-up of patients  
35 210 over a period of 3 to 6 consecutive months, after standard nutritional clinical practice  
36 211 intervention, and physical activity to control their disease-related malnutrition.

37 212 The study may be considered non-interventional since patients will undergo nutritional  
38 213 interventions and the standard treatment planned by their physician for treatment according  
39 214 to his/her standard clinical practice, and the only addition to the standard measurement and  
40 215 follow-up techniques of the patient will be the performance of a muscle ultrasound  
41 216 measurement using equipment provided to the centre for this purpose.

42 217 Patients over 18 years of age who, in the first week of hospital admission in medical-surgical  
43 218 areas, excluding critical patients, have an assessment of risk of malnutrition according to the

1  
2  
3 219 MUST and SARC-F screening test using R-MAPP. [(MUST: Malnutrition Universal Screening  
4 220 Tool; SARC-F is an acronym of 5 domains included in the questionnaire: 1) Strength, 2)  
5 221 Assistance with walking, 3) Rising from a chair, 4) Climbing stairs, and 5) Falls; R-MAPP  
6 222 (Remote consultation on MAInutrition in the Primary Practice)].

7  
8  
9 223 If the results show a moderate or high risk of malnutrition, these patients will be invited to  
10 224 participate in the study, and will undergo the morpho functional assessment, an ultrasound  
11 225 study and the Subjective Global Assessment (SGA). This study is registered under  
12 226 ClinicalTrials.gov (NCT05433831).

13  
14  
15 227 Figure 2 shows the schedule of enrolment, interventions, and assessments.

### 16 228 **2.1. Inclusion criteria**

- 17  
18  
19 229 ● Patients admitted to hospital who in the first week of admission have moderate or high  
20 230 risk of malnutrition according to the MUST and SARC-F screening test using R-  
21 231 MAPP.  
22  
23 232 ● Patients aged 18 to 85 years.  
24  
25 233 ● Patient who agrees to participate in the study and signs the informed consent.

### 26 234 **2.2. Exclusion criteria**

- 27  
28 235 ● Hepatic impairment - AST/ALT (aspartate aminotransferase/alanine  
29 236 aminotransferase) 3 x upper limit of normal.  
30  
31 237 ● Chronic kidney failure - GFR (glomerular filtration rate) <45 mL/min).  
32  
33 238 ● Patients with previous ICU (intensive care unit) stay during the study admission.  
34  
35 239 ● Cancer patients on palliative treatment or ECOG (Eastern Cooperative Oncology  
36 240 Group)  $\geq 3$ .  
37  
38 241 ● Orthopaedic disease that does not allow adequate walking.  
39  
40 242 ● Patients with known dementia or others not related to a significant neurological or  
41 243 psychiatric disorder, or any other psychological condition that may interfere with the  
42 244 conduct of the study.  
43  
44 245 ● Patients with eating disorders.  
45  
46 246 ● Life expectancy of less than 6 months.  
47  
48 247 ● Patients unable to adequately complete the clinical laboratory assessments required  
49 248 for the study protocol.

### 50 249 **2.3. Sample size calculation**

51  
52 250 There are no previous clinical trials focusing on this objective published in the literature. We  
53 251 report a study in patients with chronic kidney disease on haemodialysis (HD) (19) where  
54 252 measurement of the rectus femoris cross-sectional muscle area (RFCSA) was validated for  
55 253 the diagnosis of malnutrition related to this condition. RFCSA compared to bioimpedance  
56 254 spectroscopy had higher area under the curve (AUC, 0.686 vs. 0.581), sensitivity (72.8% vs.  
57 255 65.8%), and specificity (55.6% vs. 53.9%). The AUC of RFCSA was higher for the risk of

256 protein-energy wasting (PEW) in male (0.74, 95% CI: 0.66 to 0.82) and female patients (0.80,  
257 95% CI: 0.70 to 0.90) (both  $p < 0.001$ ). Gender-specific RFCSA values (males  $< 6.00 \text{ cm}^2$ ;  
258 females  $< 4.47 \text{ cm}^2$ ) indicated that HD patients with lower RFCSA were 8 times more likely to  
259 have PEW (AOR = 8.63, 95% CI: 4.80-15.50,  $p < 0.001$ ).

260 Our study aims to establish the feasibility of nutritional ultrasound measurements at different  
261 ages in both sexes to apply to patients with nutritional risk worldwide. For this purpose, the  
262 electronic CRF will be programmed with the sample distributed by quotas to cover 50% men  
263 and 50% women, as well as 10-year age ranges. Age-stratified sampling is designed to obtain  
264 representative results of different ages and could be associated with the results of VGS, BIA,  
265 and dynamometry. Variability of measurements should be adjusted for sex, age and  
266 anthropometric parameters such as height.

267 It is estimated that 1,000 patients with nutritional risk will be discharged from 20-25 healthcare  
268 centres throughout Spain and that at least 60% of the population will complete the 3-to-6-  
269 month follow-up of the study. Due to the special pandemic situation, a higher-than-expected  
270 drop-out rate is expected at 6 months than under normal conditions (40% are estimated not  
271 to complete the 6-month follow-up for any reason).

#### 272 **2.4. Study conduct**

273 The physicians participating in the study will be responsible for assessing the suitability of  
274 inclusion for each patient.

275 Patients will be consecutively recruited by the physician as they are assessed daily in their  
276 clinical practice at the hospital and found to have a risk of malnutrition according to the  
277 MUST/SARC-F (R-MAPP) screening test.

278 Before inclusion, the investigator must check the inclusion and exclusion criteria and obtain  
279 their informed consent.

280 The physician will be responsible for applying nutritional intervention and physical activity  
281 treatment according to standard clinical practice, as well as for clinical monitoring of patients.

282 The treatment prescribed to each patient is not the objective of this study and is how the  
283 patient will experience changes that must be recorded with the different techniques described  
284 and with the muscle ultrasound involved in this study.

285 All physicians participating in the study must have been previously trained in the use of the  
286 ultrasound equipment and materials provided for the study, as well as in the use of the  
287 electronic CRF for data entry designed for this study.

288 Throughout the entire study, monthly meetings are held with all participants on Thursdays at  
289 8:30 a.m., and on Fridays at 8:30 a.m. with the study's central committee. The objective of  
290 these meetings is to monitor the status of the study at each participating center, to resolve  
291 doubts, and to make sure that all techniques and measurements are properly made according  
292 to previous training.



#### 2.4.1. Nutritional ultrasound techniques and measurements

US accuracy highly depends on the skills of the technician. Point training using rectus femoris phantom have shown to improve the accuracy of measurements. (20) Before starting the study, a training session was held. All study participants were required to attend, and they had the opportunity to practice with the same ultrasound machine that was going to be used in the study in phantom patients. Besides, several videos explaining detailed measurements technique were recorded. These videos were proactively shared with all researchers and available anytime at the study on-line electronic data capture (EDC) platform.

Beyond, once the study finishes, all DICOM images gathered will be analysed to develop a semi-automated algorithm that helps diagnose the patient's nutritional status. Subsequently, once the algorithm is available, the individual and manual US measurements will be contrasted with the data showed by the automatic algorithm, thus minimizing the inter and intra observer correlation. This work will have its own analysis and publication plan.

Abdominal and anterior thigh muscle measurements are performed using a commercially available portable ultrasound system with a 4-10 cm linear tube (UProbe L6C Ultrasound Scanner, Guangzhou Sonostar Technologies Co., Ltd., Guangzhou, Guangdong, P.R. China). The funder of the study provided an ultrasound machine to each of the participants hospitals.

##### 2.4.1a. Quadriceps rectus femoris (QRF) ultrasound (see Figure 3)

With the patient lying supine with knees extended and relaxed, ultrasound measurements of unilateral (right side) quadriceps rectus femoris is performed at each participating center by an experienced medical sonographer blinded to the clinical data and other results of nutritional assessment. The acquisition site is located two-thirds of the way along the femur length, measured between the anterior superior iliac spine and the upper edge of the patella. The transducer is placed perpendicular to the long axis of the thigh with excessive use of contact gel and minimal pressure to avoid compression of the muscle. All parameters are taken as an average of three consecutive measurements in the dominant leg. We measure the transversal axis of the cross-sectional area (CSA) in  $\text{cm}^2$ , the X-axis and Y-axis in mm, which corresponded to the linear measurement of the distance between the muscular limits of the rectus femoris (lateral and anteroposterior), the X-axis/Y-axis ratio, and the total fat tissue in mm. All US parameters were also standardized divided by height squared (in  $\text{cm}^2$  for rectus femoris). The DICOM images of the QRF ultrasounds will be kept for later analysis.

Figure 3 – Comparison of longitudinal and transversal sections of the QRF muscle area ultrasound. Functional measures and main anatomical structures are represented.

#### 330 **2.4.1b. Abdominal ultrasound (see Figure 4)**

331 The second component of nutritional ultrasound is the evaluation of fat at the level of the  
332 abdominal wall. (21) The location of the measurement point is set at the midpoint between  
333 the xiphoid appendix and the navel on the midline. The patient remains in a supine position  
334 in a situation of relaxation and the image is taken during the unforced expiration, in a  
335 transverse plane using the same linear probe perpendicular to the skin. In the cross-  
336 section, the anatomical structures that are visualized are ordered from the most superficial  
337 layer corresponding to the epidermis, followed by the layer of subcutaneous, superficial,  
338 and deep adipose tissue. Then the two muscles of the anterior rectum of the abdomen that  
339 join in the central part in the linea alba are identified. (21) We measure both total and  
340 superficial subcutaneous adipose tissue and the pre-peritoneal visceral adipose tissue. The  
341 DICOM images of the abdominal ultrasounds will be kept for later analysis.

342 Figure 4 - Comparison of longitudinal and transversal sections of the abdominal area  
343 ultrasound. Functional measures and main anatomical structures are represented.

#### 344 • **2.4.2 Bioelectrical Impedance (BIA)**

345 Total body BIA (50-kHz frequency) (Tanita BC-420MA BIA analyzer, Tanita Corporation,  
346 Arlington Heights, IL, USA) was used to determine phase angle (degrees), total body water  
347 (%), fat mass (kg), lean mass (kg), body cell mass (kg), and appendicular skeletal muscle  
348 mass (ASMM) (kg).

349 Since interval fluid balance is more sensible to the change of edema, bioelectrical  
350 impedance analysis can be affected in edematous patients. (22) Therefore, extreme phase  
351 angle values and/or non-coherent reactance/resistance ratios will be discarded, as a control  
352 measure, to detect patients with edema and fluid balance change.

#### 353 • **2.4.3 Timed Up and Go test (TUG)**

354 The TUG test was used to assess functionality. A coloured tape was marked 3 m away  
355 from an armless chair in which participants were sitting. Participants were asked to walk 3  
356 m, turn around the marked tape, and return to the chair as fast as they could. A timer was  
357 set as soon as the patient stood up from the chair and was stopped when the patient was  
358 seated again. At least one practice trial was performed before the test. Being that a TUG-  
359 score of  $\geq 20$  s is identified as a cut-off point for severe sarcopenia, TUG was considered in  
360 this study. (23)

#### 361 • **2.4.4 Handgrip strength test**

362 Handgrip strength was determined using the Jamar dynamometer (J A Preston  
363 Corporation, New York, NY, USA). The dominant hand was tested. Three measurements of  
364 both media and maximum value were taken. The American Society for Parenteral and  
365 Enteral Nutrition has included the assessment of grip strength by dynamometer as one of  
366



367 the six criteria to define malnutrition. (24) In this study, the cut-off values defined for the  
 368 Spanish population will be considered. (14)

369

370 Although some quality-of-life test, such as SF-36 or ADL test (activities of daily living), were  
 371 initially considered in the study protocol, they were finally rejected because, in real clinical  
 372 practice, these tests are not used with the patient profile included in this study.

373

#### 374 ● 2.4.5 Follow-up period

375 The planned follow-up period for each patient will be 3 to 6 months from the inclusion visit.

376 The investigating physician will perform at least one first inclusion visit, and a follow-up visit  
 377 at 3 and 6 months for each patient. A follow-up period of 6 months was established since it  
 378 is common clinical practice in these patients, and with the aim of making the results more  
 379 generalizable.

380 It is planned that the same physician attends the three visits to the patient (baseline, 3 and 6  
 381 months), to minimise the interpersonal variability in the measurements.

382

#### 383 ● 2.4.6. Study duration

384 The study is planned to last 18 months to detect patients at risk of malnutrition, recruitment,  
 385 field work, monitoring and data analysis.

386 An estimated 2-3 months will be needed to plan the coordination and distribution of the work  
 387 in the hospitalisation and outpatient clinic areas for the selection of candidate patients. It will  
 388 take 6 to 9 months to recruit patients. From the start of the study, the database will be  
 389 completed, and preliminary analyses will be performed. The final analysis will be performed  
 390 when the follow-up is completed together with writing of the related work that will require 4 to  
 391 6 months to complete.

### 392 2.5. Outcome measures

393 A list of the outcomes of interest is provided in Table 1.

394

395 Table 1. Study outcomes.

| PRIMARY OUTCOMES                                                            |                                                                                                                                                                                                                                                                             |
|-----------------------------------------------------------------------------|-----------------------------------------------------------------------------------------------------------------------------------------------------------------------------------------------------------------------------------------------------------------------------|
| Nutritional ultrasound measurements: ultrasound with 4-10 cm linear probe * |                                                                                                                                                                                                                                                                             |
|                                                                             | ● Abdominal ultrasound: total, superficial and pre-peritoneal adipose tissue (measured in centimetres)                                                                                                                                                                      |
|                                                                             | ● Muscle ultrasound: Area, circumference, axes and adipose tissue (measured in centimetres)                                                                                                                                                                                 |
| SECONDARY OUTCOMES                                                          |                                                                                                                                                                                                                                                                             |
| Sociodemographic data:                                                      |                                                                                                                                                                                                                                                                             |
|                                                                             | <ul style="list-style-type: none"> <li>● Age</li> <li>● Sex</li> <li>● Educational level</li> <li>● Toxic habits</li> <li>● Medical history</li> <li>● Risk of sarcopenia and moderate to high malnutrition based on MUST and SARC-F screening test using R-MAPP</li> </ul> |

|                                                                 |                                                                                                                                                                                                                                                                                                                                                                                                                                                                                                                                            |
|-----------------------------------------------------------------|--------------------------------------------------------------------------------------------------------------------------------------------------------------------------------------------------------------------------------------------------------------------------------------------------------------------------------------------------------------------------------------------------------------------------------------------------------------------------------------------------------------------------------------------|
| Subjective Global Assessment (SGA) questionnaire                |                                                                                                                                                                                                                                                                                                                                                                                                                                                                                                                                            |
| Anthropometric data:                                            |                                                                                                                                                                                                                                                                                                                                                                                                                                                                                                                                            |
|                                                                 | <ul style="list-style-type: none"> <li>• Current body weight (measured or estimated)</li> <li>• Usual weight</li> <li>• Adjusted weight (adjusted weight in obese subjects, dry weight without oedema in malnourished subjects)</li> <li>• Height (measured or estimated)</li> <li>• BMI</li> <li>• Arm circumference</li> </ul>                                                                                                                                                                                                           |
| Bioelectrical impedance data (model (50 kHz): **                |                                                                                                                                                                                                                                                                                                                                                                                                                                                                                                                                            |
|                                                                 | <ul style="list-style-type: none"> <li>• TBW (total body water, L)</li> <li>• ECW (extracellular water, L)</li> <li>• ICW (intracellular water, L)</li> <li>• FFM (lean mass, kg)</li> <li>• FM (fat mass, kg)</li> <li>• BCM (body cell mass, kg)</li> <li>• ASMM (appendicular skeletal muscle mass, kg)</li> <li>• SMI (skeletal muscle mass index, kg)</li> <li>• Percent hydration</li> <li>• Body fat (%)</li> </ul>                                                                                                                 |
| Blood biochemistry data (at baseline visit, at 3 and 6 months): |                                                                                                                                                                                                                                                                                                                                                                                                                                                                                                                                            |
|                                                                 | <ul style="list-style-type: none"> <li>• Albumin</li> <li>• Prealbumin</li> <li>• C-reactive protein</li> <li>• Total cholesterol</li> <li>• Lymphocytes</li> </ul>                                                                                                                                                                                                                                                                                                                                                                        |
| Bioelectrical impedance data (model (50 kHz):                   |                                                                                                                                                                                                                                                                                                                                                                                                                                                                                                                                            |
|                                                                 | <ul style="list-style-type: none"> <li>• Age</li> <li>• Sex</li> <li>• Educational level</li> <li>• Toxic habits</li> <li>• Medical history</li> <li>• Risk of sarcopenia and moderate to high malnutrition based on MUST and SARC-F screening test using R-MAPP</li> </ul>                                                                                                                                                                                                                                                                |
| Functional parameters                                           |                                                                                                                                                                                                                                                                                                                                                                                                                                                                                                                                            |
|                                                                 | <ul style="list-style-type: none"> <li>• Timed Up and Go test (TUG): patient sits in a chair and is told to get up (timing starts), walks 3 metres, comes back and sits in the initial chair (timing ends). Interpretation: &lt;20 seconds: normal, &gt; 20 seconds: increased risk of falling.</li> <li>• Dynamometry. Three measurements of the dominant hand will be made recording the mean and maximum, measured in kilograms. Jamar® dynamometers are most used in international studies and have several grip positions.</li> </ul> |
| Current patient status                                          |                                                                                                                                                                                                                                                                                                                                                                                                                                                                                                                                            |
|                                                                 | <ul style="list-style-type: none"> <li>• Hospital stays, mortality at 3 and 6 months, hospital readmissions and complications, if occurring, and their consequences (resolved/unresolved) must be recorded in the form.</li> </ul>                                                                                                                                                                                                                                                                                                         |
| Adherence                                                       |                                                                                                                                                                                                                                                                                                                                                                                                                                                                                                                                            |
|                                                                 | <ul style="list-style-type: none"> <li>• Attendance to study follow-up visits.</li> </ul>                                                                                                                                                                                                                                                                                                                                                                                                                                                  |

\*The equipment provided for the study is the UProbe L6C Ultrasound Scanner (linear transducer 7.5-10 kHz) that allows depths up to 100 mm. Manufactured by Guangzhou Sonostar Technologies Co., Ltd. PR China.

## 2.6. Data analysis plan

Data analysis will be performed using SPSS 22.0 software (SPSS Inc., Chicago, IL, USA). Quantitative variables will be expressed as mean  $\pm$  standard deviation. The comparison between qualitative variables will be performed using the Chi-square test with Fisher's correction when necessary. Quantitative variables will be analysed using a Kolmogorov-Smirnov test. Differences between quantitative variables will be analysed using Student's t or ANOVA tests (for two or more samples, respectively) and non-parametric tests (Mann-Whitney or Kruskal-Wallis) will be used when the variables to be analysed do not follow a normal distribution.

1  
2  
3 409 Kappa coefficient will be used to assess agreement between techniques in diagnosis of  
4 410 malnutrition.

5  
6 411 The association between variables will be studied using Spearman or Pearson correlations  
7 412 according to normality.

8  
9 413 The thresholds for translation into clinical practice will be presented as cut-off points that will  
10 414 be estimated by AUC ROC curves. Centiles will be also considered.

11  
12 415 The significant associations between muscle ultrasound parameters and the objective clinical  
13 416 variables in the univariate analysis will then be analysed in multivariate logistic regression  
14 417 models which also control other confounding variables. To assess which nutritional tool best  
15 418 predicts the risk of mortality during admission (and re-admission), we will perform multivariate  
16 419 logistic regression models, in which the dependent variable will be in-hospital mortality (or re-  
17 420 admission) based on the different tools applied (e.g. ultrasound, phase angle, SGA criteria,  
18 421 GLIM, LMI), also controlling for sex, the presence of previous comorbidities and other  
19 422 variables showing association in the univariate study.

20  
21 423 For all calculations, a probability  $p$  less than 0.05 for two tails will be considered significant.

22  
23 424 • **2.6.1. Recording of adverse reactions**

24  
25 425 Adverse reactions reporting is not the objective of the study. The investigator should proceed  
26 426 as usual and through the channels established in the healthcare system if any adverse effect  
27 427 occurs during follow-up. It will only be recorded in the follow-up if the patient must leave the  
28 428 study for this reason for statistical purposes.

29  
30 429 • **2.6.2. Handling of missing data**

31  
32 430 No formal imputation will be made for the different analyses; therefore, all estimates will be  
33 431 obtained using all available data (available data only, ADO).

34  
35 432 Since the study will be recorded using an electronic CRF (case report form), the necessary  
36 433 consistency filters and alerts for missing data will be programmed to validate and store the  
37 434 information, to minimise missing data and prevent the entry of incorrect or out of range data.

38  
39 435 **3. ETHICS**

40  
41 436 **3.1. General aspects**

42  
43 437 This study will be conducted in accordance with current regulations, accepted international  
44 438 ethical standards of Good Clinical Practice (CPMP/ICH/135/95), the principles laid down in  
45 439 the latest version of the Declaration of Helsinki, RD 1591/2009 and Circular No. 07/2004  
46 440 regulating clinical research with medical devices.

47  
48 441 **3.2. Informed consent**

49  
50 442 Before inclusion in the study and after considering the suitability of patient inclusion, all  
51 443 participating physicians must offer the patient information about the study using a patient  
52 444 information sheet, invite the patient to participate in it, answer their questions and request  
53 445 completion of the informed consent form that will be kept in their own file.

### 446 **3.3. Evaluation by an Ethics Committee**

447 All DRECO study materials have been approved by each of the IRB/IEC of all the sites  
448 enrolled (either approval of the own IRB/IEC or validating the approval of the IRB/IEC of  
449 another hospital).

### 450 **3.4. Confidentiality**

451 The study data will be entered into an automated file owned by the sponsor. The analysis of  
452 study results will be made from an anonymised database, that is, dissociated, with no  
453 personal data, so that no subject can be identified or identifiable. This study database will be  
454 extracted from the electronic CRF and will include data from physician records, impedance  
455 recordings, and muscle ultrasound images. Data from different sources will be linked from  
456 the patient code and will not include personal data. All data in the file owned by the sponsor  
457 will be treated confidentially. The sponsor undertakes not to transfer data to third parties.

### 458 **3.5. Dissemination**

459 Results from this study will be presented at international and national scientific conferences,  
460 and in peer-reviewed scientific journals.

### 461 **3.6. Patient and Public Involvement**

462 Patients and/or the public were not involved in the design, or conduct, or reporting, or  
463 dissemination plans of this research.

## 464 **4. DISCUSSION**

465 There is a growing interest in the literature on the evaluation of muscle mass by ultrasound  
466 (21). Its current clinical utility focuses on measuring the involvement of muscle mass to  
467 assess the nutritional status of a patient (25). The further step that it is being investigated in  
468 this clinical study, is that muscle ultrasound becomes not only a tool to assess the diagnosis  
469 of malnutrition but to integrate it in the routine clinical practices to evaluate nutritional  
470 interventions.

471 The evaluation of the nutritional ultrasound should enable clinical decisions based on its  
472 results to permit the adjustment and individualization of the nutritional therapeutic and  
473 physical exercise plan, along with functional recovery (21).

474 To the best of our knowledge, this is going to be the largest study (sample size=1,000) using  
475 nutritional ultrasound in patients with nutritional risk. Current scientific evidence is limited,  
476 and it is expected that such a large population will allow us to validate and define specific cut-  
477 off values for nutritional ultrasound and get its correlation with already well-known nutritional  
478 tools such as SGA or GLIM criteria (26).

479 This study stands out for the use of several morphofunctional assessment techniques in  
480 patients with disease-related malnutrition in real clinical practice. Beyond its large sample, it  
481 is the first study with this design, as a real-world study, to evaluate the feasibility of nutritional  
482 ultrasound.

1  
2  
3 483 The emerging field of ultrasound assessment of muscle mass only highlights the need for a  
4 484 standardisation of measurement technique as Perkisas, *et al* outline in their recently  
5 485 published 2022 SARCUS update. This update provides the approach of muscle assessment  
6 486 according to the most recent literature and anatomical landmarks for 39 different muscles.  
7  
8 487 Besides, the discussion about 4 new muscle parameters that are added to the 5 that were  
9 488 previously considered is also presented (27) and some of these parameters have been  
10 489 correlated with PhA (28) and they will be analysed in our present protocol. Our ongoing study  
11 490 is intended to standardize these outstanding technique measures, to apply this technique  
12 491 widely soon. Recruited patients were at risk of malnutrition so the results will be very  
13 492 interesting for routine clinical practice and nutritional care, in this patient profile, easily  
14 493 generalizable and free to use with publication.

15 494 **Author Contributions:** All authors have identified the research question and were  
16 495 responsible for the conception and design of the protocol and the study. JM.G.A., D.B. D.L.R,  
17 496 and G.O. are conducting study investigation. G.G.R has managed funding acquisition. All  
18 497 authors have been involved in drafting the manuscript and revising it critically for intellectual  
19 498 content. All authors read and approved the final manuscript.

20 499 **Funding:** This study will be conducted thanks to Abbott Laboratories funding.

21 500 **Conflicts of Interest:** JM.G.A., D.B. D.L.R, and G.O declare no conflict of interest. G.G.R is  
22 501 an employee of Abbott Laboratories.

23 502 **Institutional Review Board Statement:** The study was conducted in accordance with the  
24 503 Declaration of Helsinki, and approved by the following Ethical Committees: Comité de Ética  
25 504 de la Investigación Provincial De Málaga, Portal de Ética de la Investigación Biomédica de  
26 505 Andalucía (PEIBA), Comité de Ética de la Investigación con medicamentos Área De Salud  
27 506 Valladolid, Comité de Ética de la Investigación con medicamentos Hospital Universitario La  
28 507 Paz, Comité de Ética de la Investigación con medicamentos Hospital Universitario 12 de  
29 508 Octubre, Comité de Ética de la Investigación con medicamentos Hospital General  
30 509 Universitario Gregorio Marañón, Comité de Ética de la Investigación con medicamentos del  
31 510 Complejo Hospitalario Universitario de Canarias (Provincia de Santa Cruz de Tenerife),  
32 511 Comité de Ética de la Investigación con medicamentos del Complejo Hospitalario  
33 512 Universitario de Las Palmas, Comité de Ética de la Investigación con medicamentos y  
34 513 Comisión de Proyectos de Investigación del Hospital Universitari Vall d'Hebron, Comité de  
35 514 Ética de la Investigación con medicamentos del Consorcio Hospital General Universitario de  
36 515 Valencia, Comité de Ética de la Investigación con medicamentos de la Clínica de Navarra,  
37 516 Comité de Ética de la Investigación con medicamentos del Hospital de Basurto and Comité  
38 517 de Ética de la Investigación con Medicamentos del Hospital Universitario y Politécnico la Fe

1  
2  
3 518 de Valencia. This study is registered at [clinicaltrials.gov](https://clinicaltrials.gov) (NCT05433831), registered on June  
4 519 27th, 2022. <https://clinicaltrials.gov/ct2/show/NCT05433831>.

5  
6 520 **Informed Consent Statement:** All participants are provided with a participant information  
7 521 sheet and are required to provide written consent.

8  
9 522

## 10 523 REFERENCES

- 11  
12  
13  
14 524 1. Soeters PB, Reijven PLM, van Bokhorst-de van der Schueren MAE, Schols JMGA,  
15 525 Halfens RJG, Meijers JMM, et al. A rational approach to nutritional assessment. *Clin Nutr*  
16 526 *Edinb Scotl.* octubre de 2008;27(5):706-16.
- 17  
18 527 2. Jensen GL, Cederholm T, Correia MITD, Gonzalez MC, Fukushima R, Higashiguchi T,  
19 528 et al. GLIM Criteria for the Diagnosis of Malnutrition: A Consensus Report From the  
20 529 Global Clinical Nutrition Community. *J Parenter Enter Nutr.* enero de 2019;43(1):32-40.
- 21  
22 530 3. García Almeida JM, García García C, Bellido Castañeda V, Bellido Guerrero D. New  
23 531 approach to nutrition. Assessment of the patient's nutritional status: function and body  
24 532 composition. *Nutr Hosp [Internet].* 4 September 2018 [cited 12 July 2020];35(3).  
25 533 Available in: <http://revista.nutricionhospitalaria.net/index.php/nh/article/view/2027>
- 26  
27 534 4. Kyle UG, Bosaeus I, De Lorenzo AD, Deurenberg P, Elia M, Gómez JM, et al.  
28 535 Bioelectrical impedance analysis--part I: review of principles and methods. *Clin Nutr*  
29 536 *Edinb Scotl.* octubre de 2004;23(5):1226-43.
- 30  
31 537 5. Norman K, Stobäus N, Pirlich M, Bösy-Westphal A. Bioelectrical phase angle and  
32 538 impedance vector analysis--clinical relevance and applicability of impedance  
33 539 parameters. *Clin Nutr Edinb Scotl.* diciembre de 2012;31(6):854-61.
- 34  
35 540 6. López-Gómez, J.J.; Benito-Sendín Plaar, K.; Izaola-Jauregui, O.; Primo-Martín, D.;  
36 541 Gómez-Hoyos, E.; Torres-Torres, B.; De Luis-Román, D.A. Muscular Ultrasonography  
37 542 in Morphofunctional Assessment of Patients with Oncological Pathology at Risk of  
38 543 Malnutrition. *Nutrients* 2022, 14, 1573.
- 39  
40 544 7. Sánchez-Torralvo FJ, Porras N, Ruiz-García I, Maldonado-Araque C, García-Olivares  
41 545 M, Girón MV, Gonzalo-Marín M, Oliveira C, Oliveira G. Usefulness of Muscle  
42 546 Ultrasonography in the Nutritional Assessment of Adult Patients with Cystic Fibrosis.  
43 547 *Nutrients.* 2022 Aug 17;14(16):3377. doi: 10.3390/nu14163377. PMID: 36014883;  
44 548 PMCID: PMC9415857.
- 45  
46 549 8. Compher C, Cederholm T, Correia MITD, Gonzalez MC, Higashiguch T, Shi HP, Bischoff  
47 550 SC, Boirie Y, Carrasco F, Cruz-Jentoft A, Fuchs-Tarlovsky V, Fukushima R, Heymsfield  
48 551 SB, Mourtzakis M, Muscaritoli M, Norman K, Nyulasi I, Pisprasert V, Prado CM, de van  
49 552 der Schuren M, Yoshida S, Yu Y, Jensen G, Barazzoni R. Guidance for assessment of



- 1  
2  
3 553 the muscle mass phenotypic criterion for the Global Leadership Initiative on Malnutrition  
4 554 diagnosis of malnutrition. *JPEN J Parenter Enteral Nutr.* 2022 Apr 19. doi:  
5 555 10.1002/jpen.2366. Epub ahead of print. PMID: 35437785.  
6  
7  
8 556 9. Ní Bhuachalla ÉB, Daly LE, Power DG, Cushen SJ, MacEneaney P, Ryan AM.  
9 557 Computed tomography diagnosed cachexia and sarcopenia in 725 oncology patients: is  
10 558 nutritional screening capturing hidden malnutrition? Is nutritional screening capturing  
11 559 hidden malnutrition in oncology patients? *J Cachexia Sarcopenia Muscle.* abril de  
12 560 2018;9(2):295-305.  
13  
14  
15 561 10. Van der Werf A, Langius J a. E, de van der Schueren M a. E, Nurmohamed SA, van der  
16 562 Pant K a. MI, Blauwhoff-Buskermolen S, et al. Percentiles for skeletal muscle index, area  
17 563 and radiation attenuation based on computed tomography imaging in a healthy  
18 564 Caucasian population. *Eur J Clin Nutr.* 2018;72(2):288-96.  
19  
20  
21 565 11. Fernández-Jiménez R, Dalla-Rovere L, García-Olivares M, et al. Phase Angle and  
22 566 Handgrip Strength as a Predictor of Disease-Related Malnutrition in Admitted Patients:  
23 567 12-Month Mortality. *Nutrients.* 2022;14(9):1851. Published 2022 Apr 28.  
24  
25  
26 568 12. White JV, Guenter P, Jensen G, Malone A, Schofield M; Academy Malnutrition Work  
27 569 Group; ASPEN Malnutrition Task Force; ASPEN Board of Directors. Consensus  
28 570 statement: Academy of Nutrition and Dietetics and American Society for Parenteral and  
29 571 Enteral Nutrition: characteristics recommended for the identification and documentation  
30 572 of adult malnutrition (undernutrition). *JPEN J Parenter Enteral Nutr* 2012;36(3):275-83  
31  
32  
33 573 13. Barata AT, Santos C, Cravo M, Vinhas M do C, Morais C, Carolino E, et al. Handgrip  
34 574 Dynamometry and Patient-Generated Subjective Global Assessment in Patients with  
35 575 Nonresectable Lung Cancer. *Nutr Cancer.* 2017;69(1):154-8.  
36  
37  
38 576 14. Sánchez Torralvo FJ, Porrás N, Abuín Fernández J, García Torres F, Tapia MJ, Lima F,  
39 577 et al. Normative reference values for hand grip dynamometry in Spain. Association with  
40 578 lean mass. *Nutr Hosp* 2018;35:98-103  
41  
42  
43 579 15. Sánchez-Torralvo FJ, González-Poveda I, García-Olivares M, Porrás N, Gonzalo-Marín  
44 580 M, Tapia MJ, Mera-Velasco S, Toval-Mata JA, Ruiz-López M, Carrasco-Campos J,  
45 581 Santoyo-Santoyo J, Oliveira G. Poor Physical Performance Is Associated with  
46 582 Postoperative Complications and Mortality in Preoperative Patients with Colorectal  
47 583 Cancer. *Nutrients.* 2022 Apr 2;14(7):1484.  
48  
49  
50 584 16. Contreras-Bolívar V, Sánchez-Torralvo FJ, Ruiz-Vico M, González-Almendros I, Barrios  
51 585 M, Padín S, Alba E, Oliveira G. GLIM Criteria Using Hand Grip Strength Adequately  
52 586 Predict Six-Month Mortality in Cancer Inpatients. *Nutrients.* 2019 Sep 1;11(9):2043.  
53  
54  
55 587 17. Podsiadlo D, Richardson S. The timed «Up & Go»: a test of basic functional mobility for  
56 588 frail elderly persons. *J Am Geriatr Soc.* febrero de 1991;39(2):142-8.  
57  
58  
59  
60

- 1  
2  
3 589 18. Sánchez-Torralvo FJ, González-Poveda I, García-Olivares M, Porrás N, Gonzalo-Marín  
4 590 M, Tapia MJ, Mera-Velasco S, Toval-Mata JA, Ruiz-López M, Carrasco-Campos J,  
5 591 Santoyo-Santoyo J, Oliveira G. Poor Physical Performance Is Associated with  
6 592 Postoperative Complications and Mortality in Preoperative Patients with Colorectal  
7 593 Cancer. *Nutrients*. 2022 Apr 2;14(7):1484.
- 8 594 19. Sahathevan S, Khor BH, Singh BKS, Sabatino A, Fiaccadori E, Daud ZAM, Ali MS,  
9 595 Narayanan SS, Tallman D, Chinna K, Goh BL, Gafor AHA, Ahmad G, Morad Z, Khosla  
10 596 P, Karupaiah T, On Behalf Of The Patch Study Malaysia Investigators. Association of  
11 597 Ultrasound-Derived Metrics of the Quadriceps Muscle with Protein Energy Wasting in  
12 598 Hemodialysis Patients: A Multicenter Cross-Sectional Study. *Nutrients*. 2020 Nov  
13 599 23;12(11):3597. doi: 10.3390/nu12113597.
- 14 600 20. Nakanishi N, Inoue S, Tsutsumi R, Akimoto Y, Ono Y, Kotani J, Sakaue H, Oto J. Rectus  
15 601 Femoris Mimicking Ultrasound Phantom for Muscle Mass Assessment: Design,  
16 602 Research, and Training Application. *J Clin Med*. 2021 Jun 20;10(12):2721. doi:  
17 603 10.3390/jcm10122721. PMID: 34202957; PMCID: PMC8235438.
- 18 604 21. J.M. García-Almeida, C. García-García, I.M. Vegas-Aguilar et al., Nutritional  
19 605 ultrasound®: Conceptualisation, technical considerations and standardisation,  
20 606 *Endocrinología, Diabetes y Nutrición*, <https://doi.org/10.1016/j.endinu.2022.03.008>
- 21 607 22. Nakanishi N, Tsutsumi R, Okayama Y, Takashima T, Ueno Y, Itagaki T, Tsutsumi Y,  
22 608 Sakaue H, Oto J. Monitoring of muscle mass in critically ill patients: comparison of  
23 609 ultrasound and two bioelectrical impedance analysis devices. *J Intensive Care*. 2019 Dec  
24 610 16;7:61. doi: 10.1186/s40560-019-0416-y. PMID: 31890223; PMCID: PMC6916000.
- 25 611 23. Cruz-Jentoft AJ, Bahat G, Bauer J, Boirie Y, Bruyère O, Cederholm T, Cooper C, Landi  
26 612 F, Rolland Y, Sayer AA, Schneider SM, Sieber CC, Topinkova E, Vandewoude M, Visser  
27 613 M, Zamboni M; Writing Group for the European Working Group on Sarcopenia in Older  
28 614 Proceople 2 (EWGSOP2), and the Extended Group for EWGSOP2. Sarcopenia: revised  
29 615 European consensus on definition and diagnosis. *Age Ageing* 2019;48(4):601. doi:  
30 616 10.1093/ageing/afz046.
- 31 617 24. White JV, Guenter P, Jensen G, Malone A, Schofield M, Academy of Nutrition and  
32 618 Dietetics Malnutrition Work Group, et al. Consensus statement of the Academy of  
33 619 Nutrition and Dietetics/American Society for Parenteral and Enteral Nutrition:  
34 620 Characteristics recommended for the identification and documentation of adult  
35 621 malnutrition (undernutrition). *J Acad Nutr Diet* 2012;112(5):730-8.
- 36 622 25. Connolly B, MacBean V, Crowley C, Lunt A, Moxham J, Rafferty GF, et al. Ultrasound  
37 623 for the assessment of peripheral skeletal muscle architecture in critical illness: a  
38 624 systematic review. *Crit Care Med*. 2015;43:897-905.



- 1  
2  
3 625 26. Huo Z, Chong F, Yin L, Lu Z, Liu J, Xu H. Accuracy of the GLIM criteria for diagnosing  
4 626 malnutrition: A systematic review and meta-analysis. *Clin Nutr.* 2022 Jun;41(6):1208-  
5 627 1217. doi: 10.1016/j.clnu.2022.04.005. Epub 2022 Apr 11. PMID: 35504163)  
6  
7  
8 628 27. Perkisas S, Bastijns S, Baudry S, Bauer J, Beaudart C, Beckwée D, Cruz-Jentoft A,  
9 629 Gasowski J, Hobbelen H, Jager-Wittenaar H, Kasiukiewicz A, Landi F, Małek M, Marco  
10 630 E, Martone AM, de Miguel AM, Piotrowicz K, Sanchez E, Sanchez-Rodriguez D,  
11 631 Scafoglieri A, Vandewoude M, Verhoeven V, Wojszel ZB, De Cock AM. Application of  
12 632 ultrasound for muscle assessment in sarcopenia: 2020 SARCUS update. *Eur Geriatr*  
13 633 *Med.* 2021 Feb;12(1):45-59. doi: 10.1007/s41999-020-00433-9. Epub 2021 Jan 2. PMID:  
14 634 33387359.  
15  
16 635 28. Primo D, Izaola O, Gómez JLL, de Luis D. Correlation of the Phase Angle with Muscle  
17 636 Ultrasound and Quality of Life in Obese Females. *Dis Markers.* 2022 Aug  
18 637 9;2022:7165126. doi: 10.1155/2022/7165126. PMID: 35983408; PMCID: PMC9381286.  
19  
20  
21  
22  
23  
24  
25  
26  
27  
28  
29  
30  
31  
32  
33  
34  
35  
36  
37  
38  
39  
40  
41  
42  
43  
44  
45  
46  
47  
48  
49  
50  
51  
52  
53  
54  
55  
56  
57  
58  
59  
60

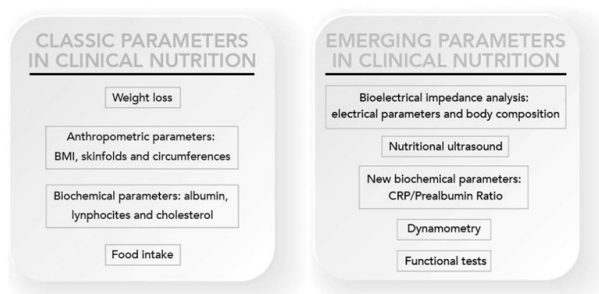

Figure 1. Update of nutritional evolution parameters. Reproduced with permission from the authors

338x190mm (96 x 96 DPI)

1  
2  
3  
4  
5  
6  
7  
8  
9  
10  
11  
12  
13  
14  
15  
16  
17  
18  
19  
20  
21  
22  
23  
24  
25  
26  
27  
28  
29  
30  
31  
32  
33  
34  
35  
36  
37  
38  
39  
40  
41  
42  
43  
44  
45  
46  
47  
48  
49  
50  
51  
52  
53  
54  
55  
56  
57  
58  
59  
60

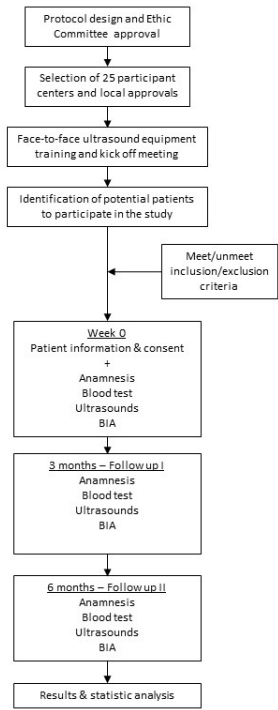

Figure 2 shows the schedule of enrolment, interventions, and assessments.

190x338mm (96 x 96 DPI)

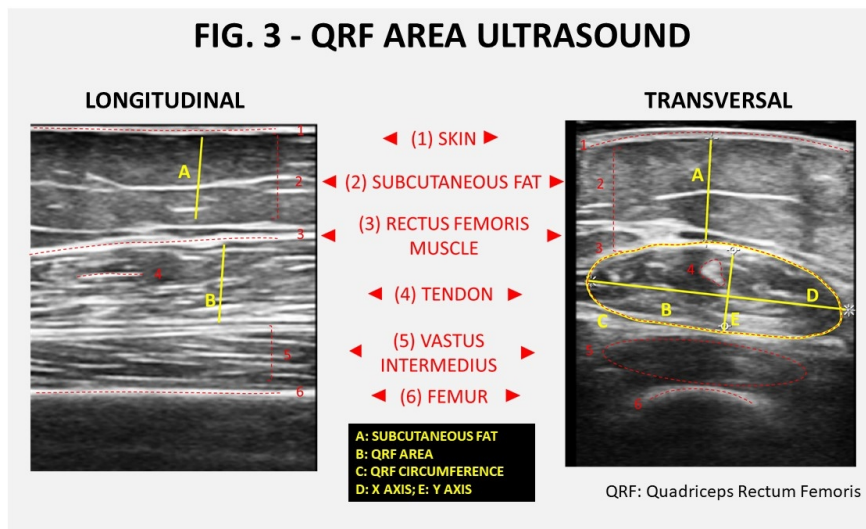

Figure 3 – Comparison of longitudinal and transversal sections of the QRF muscle area ultrasound. Functional measures and main anatomical structures are represented.

338x190mm (96 x 96 DPI)

1  
2  
3  
4  
5  
6  
7  
8  
9  
10  
11  
12  
13  
14  
15  
16  
17  
18  
19  
20  
21  
22  
23  
24  
25  
26  
27  
28  
29  
30  
31  
32  
33  
34  
35  
36  
37  
38  
39  
40  
41  
42  
43  
44  
45  
46  
47  
48  
49  
50  
51  
52  
53  
54  
55  
56  
57  
58  
59  
60

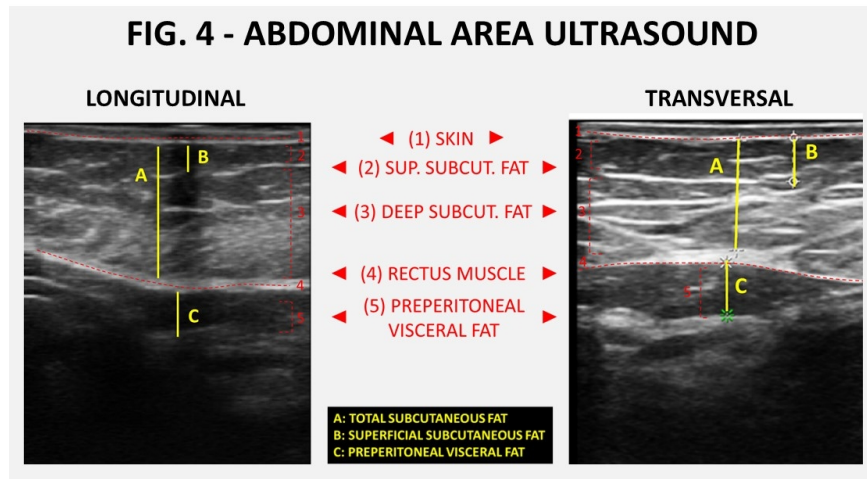

Figure 4 - Comparison of longitudinal and transversal sections of the QRF muscle area ultrasound. Functional measures and main anatomical structures are represented.

338x190mm (96 x 96 DPI)

# Reporting checklist for protocol of a clinical trial.

Based on the SPIRIT guidelines.

## Instructions to authors

Complete this checklist by entering the page numbers from your manuscript where readers will find each of the items listed below.

Your article may not currently address all the items on the checklist. Please modify your text to include the missing information. If you are certain that an item does not apply, please write "n/a" and provide a short explanation.

Upload your completed checklist as an extra file when you submit to a journal.

In your methods section, say that you used the SPIRIT reporting guidelines, and cite them as:

Chan A-W, Tetzlaff JM, Gøtzsche PC, Altman DG, Mann H, Berlin J, Dickersin K, Hróbjartsson A, Schulz KF, Parulekar WR, Krleža-Jerić K, Laupacis A, Moher D. SPIRIT 2013 Explanation and Elaboration: Guidance for protocols of clinical trials. *BMJ*. 2013;346:e7586

|                                   | Reporting Item                                                                                                                  | Page Number |
|-----------------------------------|---------------------------------------------------------------------------------------------------------------------------------|-------------|
| <b>Administrative information</b> |                                                                                                                                 |             |
| Title                             | <a href="#">#1</a> Descriptive title identifying the study design, population, interventions, and, if applicable, trial acronym | 1           |

|    |                     |                     |                                                    |       |
|----|---------------------|---------------------|----------------------------------------------------|-------|
| 1  | Trial registration  | <a href="#">#2a</a> | Trial identifier and registry name. If not yet     | 2     |
| 2  |                     |                     | registered, name of intended registry              |       |
| 3  |                     |                     |                                                    |       |
| 4  |                     |                     |                                                    |       |
| 5  |                     |                     |                                                    |       |
| 6  | Trial registration: | <a href="#">#2b</a> | All items from the World Health Organization Trial | 2     |
| 7  | data set            |                     | Registration Data Set                              |       |
| 8  |                     |                     |                                                    |       |
| 9  |                     |                     |                                                    |       |
| 10 |                     |                     |                                                    |       |
| 11 |                     |                     |                                                    |       |
| 12 | Protocol version    | <a href="#">#3</a>  | Date and version identifier                        | NA    |
| 13 |                     |                     |                                                    |       |
| 14 |                     |                     |                                                    |       |
| 15 | Funding             | <a href="#">#4</a>  | Sources and types of financial, material, and      | 12    |
| 16 |                     |                     | other support                                      |       |
| 17 |                     |                     |                                                    |       |
| 18 |                     |                     |                                                    |       |
| 19 |                     |                     |                                                    |       |
| 20 | Roles and           | <a href="#">#5a</a> | Names, affiliations, and roles of protocol         | 1; 12 |
| 21 | responsibilities:   |                     | contributors                                       |       |
| 22 |                     |                     |                                                    |       |
| 23 | contributorship     |                     |                                                    |       |
| 24 |                     |                     |                                                    |       |
| 25 |                     |                     |                                                    |       |
| 26 |                     |                     |                                                    |       |
| 27 |                     |                     |                                                    |       |
| 28 | Roles and           | <a href="#">#5b</a> | Name and contact information for the trial         | 1     |
| 29 | responsibilities:   |                     | sponsor                                            |       |
| 30 |                     |                     |                                                    |       |
| 31 | sponsor contact     |                     |                                                    |       |
| 32 |                     |                     |                                                    |       |
| 33 | information         |                     |                                                    |       |
| 34 |                     |                     |                                                    |       |
| 35 |                     |                     |                                                    |       |
| 36 |                     |                     |                                                    |       |
| 37 |                     |                     |                                                    |       |
| 38 | Roles and           | <a href="#">#5c</a> | Role of study sponsor and funders, if any, in      | 1;12  |
| 39 | responsibilities:   |                     | study design; collection, management, analysis,    |       |
| 40 |                     |                     | and interpretation of data; writing of the report; |       |
| 41 | sponsor and funder  |                     | and the decision to submit the report for          |       |
| 42 |                     |                     | publication, including whether they will have      |       |
| 43 |                     |                     | ultimate authority over any of these activities    |       |
| 44 |                     |                     |                                                    |       |
| 45 |                     |                     |                                                    |       |
| 46 |                     |                     |                                                    |       |
| 47 |                     |                     |                                                    |       |
| 48 |                     |                     |                                                    |       |
| 49 |                     |                     |                                                    |       |
| 50 |                     |                     |                                                    |       |
| 51 |                     |                     |                                                    |       |
| 52 | Roles and           | <a href="#">#5d</a> | Composition, roles, and responsibilities of the    | 1;12  |
| 53 | responsibilities:   |                     | coordinating centre, steering committee, endpoint  |       |
| 54 |                     |                     | adjudication committee, data management team,      |       |
| 55 | committees          |                     |                                                    |       |
| 56 |                     |                     |                                                    |       |
| 57 |                     |                     |                                                    |       |
| 58 |                     |                     |                                                    |       |
| 59 |                     |                     |                                                    |       |
| 60 |                     |                     |                                                    |       |



and other individuals or groups overseeing the trial, if applicable (see Item 21a for data monitoring committee)

## Introduction

|                                                 |                     |                                                                                                                                                                                                            |     |
|-------------------------------------------------|---------------------|------------------------------------------------------------------------------------------------------------------------------------------------------------------------------------------------------------|-----|
| Background and rationale                        | <a href="#">#6a</a> | Description of research question and justification for undertaking the trial, including summary of relevant studies (published and unpublished) examining benefits and harms for each intervention         | 1-5 |
| Background and rationale: choice of comparators | <a href="#">#6b</a> | Explanation for choice of comparators                                                                                                                                                                      | NA  |
| Objectives                                      | <a href="#">#7</a>  | Specific objectives or hypotheses                                                                                                                                                                          | 5-6 |
| Trial design                                    | <a href="#">#8</a>  | Description of trial design including type of trial (eg, parallel group, crossover, factorial, single group), allocation ratio, and framework (eg, superiority, equivalence, non-inferiority, exploratory) |     |

## Methods:

Participants, interventions, and outcomes

|    |                      |                      |                                                        |              |
|----|----------------------|----------------------|--------------------------------------------------------|--------------|
| 1  | Study setting        | <a href="#">#9</a>   | Description of study settings (eg, community           | 6-7          |
| 2  |                      |                      | clinic, academic hospital) and list of countries       |              |
| 3  |                      |                      | where data will be collected. Reference to where       |              |
| 4  |                      |                      | list of study sites can be obtained                    |              |
| 5  |                      |                      |                                                        |              |
| 6  |                      |                      |                                                        |              |
| 7  |                      |                      |                                                        |              |
| 8  |                      |                      |                                                        |              |
| 9  |                      |                      |                                                        |              |
| 10 |                      |                      |                                                        |              |
| 11 | Eligibility criteria | <a href="#">#10</a>  | Inclusion and exclusion criteria for participants. If  | 7            |
| 12 |                      |                      | applicable, eligibility criteria for study centres and |              |
| 13 |                      |                      | individuals who will perform the interventions (eg,    |              |
| 14 |                      |                      | surgeons, psychotherapists)                            |              |
| 15 |                      |                      |                                                        |              |
| 16 |                      |                      |                                                        |              |
| 17 |                      |                      |                                                        |              |
| 18 |                      |                      |                                                        |              |
| 19 |                      |                      |                                                        |              |
| 20 |                      |                      |                                                        |              |
| 21 | Interventions:       | <a href="#">#11a</a> | Interventions for each group with sufficient detail    | 8            |
| 22 |                      |                      | to allow replication, including how and when they      |              |
| 23 | description          |                      | will be administered                                   |              |
| 24 |                      |                      |                                                        |              |
| 25 |                      |                      |                                                        |              |
| 26 |                      |                      |                                                        |              |
| 27 |                      |                      |                                                        |              |
| 28 |                      |                      |                                                        |              |
| 29 | Interventions:       | <a href="#">#11b</a> | Criteria for discontinuing or modifying allocated      | NO DRUG      |
| 30 |                      |                      | interventions for a given trial participant (eg, drug  | INTERVENTION |
| 31 | modifications        |                      | dose change in response to harms, participant          |              |
| 32 |                      |                      | request, or improving / worsening disease)             |              |
| 33 |                      |                      |                                                        |              |
| 34 |                      |                      |                                                        |              |
| 35 |                      |                      |                                                        |              |
| 36 |                      |                      |                                                        |              |
| 37 |                      |                      |                                                        |              |
| 38 |                      |                      |                                                        |              |
| 39 | Interventions:       | <a href="#">#11c</a> | Strategies to improve adherence to intervention        | NO DRUG      |
| 40 |                      |                      | protocols, and any procedures for monitoring           | INTERVENTION |
| 41 | adherence            |                      | adherence (eg, drug tablet return; laboratory          |              |
| 42 |                      |                      | tests)                                                 |              |
| 43 |                      |                      |                                                        |              |
| 44 |                      |                      |                                                        |              |
| 45 |                      |                      |                                                        |              |
| 46 |                      |                      |                                                        |              |
| 47 |                      |                      |                                                        |              |
| 48 |                      |                      |                                                        |              |
| 49 | Interventions:       | <a href="#">#11d</a> | Relevant concomitant care and interventions that       | NA           |
| 50 |                      |                      | are permitted or prohibited during the trial           |              |
| 51 | concomitant care     |                      |                                                        |              |
| 52 |                      |                      |                                                        |              |
| 53 |                      |                      |                                                        |              |
| 54 | Outcomes             | <a href="#">#12</a>  | Primary, secondary, and other outcomes,                | 10 – TABLE 1 |
| 55 |                      |                      | including the specific measurement variable (eg,       |              |
| 56 |                      |                      |                                                        |              |
| 57 |                      |                      |                                                        |              |
| 58 |                      |                      |                                                        |              |
| 59 |                      |                      |                                                        |              |
| 60 |                      |                      |                                                        |              |

1 systolic blood pressure), analysis metric (eg,  
 2 change from baseline, final value, time to event),  
 3 method of aggregation (eg, median, proportion),  
 4 and time point for each outcome. Explanation of  
 5 the clinical relevance of chosen efficacy and harm  
 6 outcomes is strongly recommended

|    |                           |                     |                                                                                                                                                                                                               |              |
|----|---------------------------|---------------------|---------------------------------------------------------------------------------------------------------------------------------------------------------------------------------------------------------------|--------------|
| 15 | Participant timeline      | <a href="#">#13</a> | Time schedule of enrolment, interventions<br>16 (including any run-ins and washouts),<br>17 assessments, and visits for participants. A<br>18 schematic diagram is highly recommended (see<br>19 Figure)      | 7 – FIGURE 2 |
| 27 | Sample size               | <a href="#">#14</a> | Estimated number of participants needed to<br>28 achieve study objectives and how it was<br>29 determined, including clinical and statistical<br>30 assumptions supporting any sample size<br>31 calculations | 7-8          |
| 39 | Recruitment               | <a href="#">#15</a> | Strategies for achieving adequate participant<br>40 enrolment to reach target sample size                                                                                                                     | 7-8          |
| 45 | <b>Methods:</b>           |                     |                                                                                                                                                                                                               | NO           |
| 47 | <b>Assignment of</b>      |                     |                                                                                                                                                                                                               | CONTROLLED   |
| 49 | <b>interventions (for</b> |                     |                                                                                                                                                                                                               | TRIAL        |
| 51 | <b>controlled trials)</b> |                     |                                                                                                                                                                                                               |              |

|    |                     |                      |                                                       |    |
|----|---------------------|----------------------|-------------------------------------------------------|----|
| 1  | Allocation:         | <a href="#">#16a</a> | Method of generating the allocation sequence          | NA |
| 2  |                     |                      |                                                       |    |
| 3  | sequence            |                      | (eg, computer-generated random numbers), and          |    |
| 4  |                     |                      |                                                       |    |
| 5  | generation          |                      | list of any factors for stratification. To reduce     |    |
| 6  |                     |                      |                                                       |    |
| 7  |                     |                      |                                                       |    |
| 8  |                     |                      | predictability of a random sequence, details of       |    |
| 9  |                     |                      |                                                       |    |
| 10 |                     |                      | any planned restriction (eg, blocking) should be      |    |
| 11 |                     |                      |                                                       |    |
| 12 |                     |                      | provided in a separate document that is               |    |
| 13 |                     |                      |                                                       |    |
| 14 |                     |                      | unavailable to those who enrol participants or        |    |
| 15 |                     |                      |                                                       |    |
| 16 |                     |                      | assign interventions                                  |    |
| 17 |                     |                      |                                                       |    |
| 18 |                     |                      |                                                       |    |
| 19 |                     |                      |                                                       |    |
| 20 | Allocation          | <a href="#">#16b</a> | Mechanism of implementing the allocation              | NA |
| 21 |                     |                      |                                                       |    |
| 22 | concealment         |                      | sequence (eg, central telephone; sequentially         |    |
| 23 |                     |                      |                                                       |    |
| 24 | mechanism           |                      | numbered, opaque, sealed envelopes),                  |    |
| 25 |                     |                      |                                                       |    |
| 26 |                     |                      | describing any steps to conceal the sequence          |    |
| 27 |                     |                      |                                                       |    |
| 28 |                     |                      | until interventions are assigned                      |    |
| 29 |                     |                      |                                                       |    |
| 30 |                     |                      |                                                       |    |
| 31 |                     |                      |                                                       |    |
| 32 | Allocation:         | <a href="#">#16c</a> | Who will generate the allocation sequence, who        | NA |
| 33 |                     |                      |                                                       |    |
| 34 | implementation      |                      | will enrol participants, and who will assign          |    |
| 35 |                     |                      |                                                       |    |
| 36 |                     |                      | participants to interventions                         |    |
| 37 |                     |                      |                                                       |    |
| 38 |                     |                      |                                                       |    |
| 39 |                     |                      |                                                       |    |
| 40 | Blinding (masking)  | <a href="#">#17a</a> | Who will be blinded after assignment to               | NA |
| 41 |                     |                      |                                                       |    |
| 42 |                     |                      | interventions (eg, trial participants, care           |    |
| 43 |                     |                      |                                                       |    |
| 44 |                     |                      | providers, outcome assessors, data analysts),         |    |
| 45 |                     |                      |                                                       |    |
| 46 |                     |                      | and how                                               |    |
| 47 |                     |                      |                                                       |    |
| 48 |                     |                      |                                                       |    |
| 49 |                     |                      |                                                       |    |
| 50 | Blinding (masking): | <a href="#">#17b</a> | If blinded, circumstances under which unblinding      | NA |
| 51 |                     |                      |                                                       |    |
| 52 | emergency           |                      | is permissible, and procedure for revealing a         |    |
| 53 |                     |                      |                                                       |    |
| 54 | unblinding          |                      | participant's allocated intervention during the trial |    |
| 55 |                     |                      |                                                       |    |
| 56 |                     |                      |                                                       |    |
| 57 |                     |                      |                                                       |    |
| 58 |                     |                      |                                                       |    |
| 59 |                     |                      |                                                       |    |
| 60 |                     |                      |                                                       |    |

1 **Methods: Data**

2  
3 **collection,**

4  
5 **management, and**

6  
7 **analysis**

8  
9  
10  
11 Data collection plan [#18a](#) Plans for assessment and collection of outcome, 10

12  
13 baseline, and other trial data, including any  
14  
15 related processes to promote data quality (eg,  
16  
17 duplicate measurements, training of assessors)  
18  
19 and a description of study instruments (eg,  
20  
21 questionnaires, laboratory tests) along with their  
22  
23 reliability and validity, if known. Reference to  
24  
25 where data collection forms can be found, if not in  
26  
27 the protocol  
28  
29  
30  
31

32 Data collection plan: [#18b](#) Plans to promote participant retention and 9

33  
34 retention complete follow-up, including list of any outcome  
35  
36 data to be collected for participants who  
37  
38 discontinue or deviate from intervention protocols  
39  
40  
41

42 Data management [#19](#) Plans for data entry, coding, security, and 10

43  
44 storage, including any related processes to  
45  
46 promote data quality (eg, double data entry;  
47  
48 range checks for data values). Reference to  
49  
50 where details of data management procedures  
51  
52 can be found, if not in the protocol  
53  
54  
55  
56  
57  
58  
59  
60

|    |                        |                      |                                                   |           |
|----|------------------------|----------------------|---------------------------------------------------|-----------|
| 1  | Statistics: outcomes   | <a href="#">#20a</a> | Statistical methods for analysing primary and     | 10        |
| 2  |                        |                      | secondary outcomes. Reference to where other      |           |
| 3  |                        |                      | details of the statistical analysis plan can be   |           |
| 4  |                        |                      | found, if not in the protocol                     |           |
| 5  |                        |                      |                                                   |           |
| 6  |                        |                      |                                                   |           |
| 7  |                        |                      |                                                   |           |
| 8  |                        |                      |                                                   |           |
| 9  |                        |                      |                                                   |           |
| 10 |                        |                      |                                                   |           |
| 11 | Statistics: additional | <a href="#">#20b</a> | Methods for any additional analyses (eg,          | 10        |
| 12 | analyses               |                      | subgroup and adjusted analyses)                   |           |
| 13 |                        |                      |                                                   |           |
| 14 |                        |                      |                                                   |           |
| 15 |                        |                      |                                                   |           |
| 16 | Statistics: analysis   | <a href="#">#20c</a> | Definition of analysis population relating to     | 10        |
| 17 | population and         |                      | protocol non-adherence (eg, as randomised         |           |
| 18 | missing data           |                      | analysis), and any statistical methods to handle  |           |
| 19 |                        |                      | missing data (eg, multiple imputation)            |           |
| 20 |                        |                      |                                                   |           |
| 21 |                        |                      |                                                   |           |
| 22 |                        |                      |                                                   |           |
| 23 |                        |                      |                                                   |           |
| 24 |                        |                      |                                                   |           |
| 25 |                        |                      |                                                   |           |
| 26 | <b>Methods:</b>        |                      |                                                   | <b>NA</b> |
| 27 |                        |                      |                                                   |           |
| 28 | <b>Monitoring</b>      |                      |                                                   |           |
| 29 |                        |                      |                                                   |           |
| 30 |                        |                      |                                                   |           |
| 31 |                        |                      |                                                   |           |
| 32 | Data monitoring:       | <a href="#">#21a</a> | Composition of data monitoring committee          |           |
| 33 | formal committee       |                      | (DMC); summary of its role and reporting          |           |
| 34 |                        |                      | structure; statement of whether it is independent |           |
| 35 |                        |                      | from the sponsor and competing interests; and     |           |
| 36 |                        |                      | reference to where further details about its      |           |
| 37 |                        |                      | charter can be found, if not in the protocol.     |           |
| 38 |                        |                      | Alternatively, an explanation of why a DMC is not |           |
| 39 |                        |                      | needed                                            |           |
| 40 |                        |                      |                                                   |           |
| 41 |                        |                      |                                                   |           |
| 42 |                        |                      |                                                   |           |
| 43 |                        |                      |                                                   |           |
| 44 |                        |                      |                                                   |           |
| 45 |                        |                      |                                                   |           |
| 46 |                        |                      |                                                   |           |
| 47 |                        |                      |                                                   |           |
| 48 |                        |                      |                                                   |           |
| 49 |                        |                      |                                                   |           |
| 50 |                        |                      |                                                   |           |
| 51 | Data monitoring:       | <a href="#">#21b</a> | Description of any interim analyses and stopping  |           |
| 52 | interim analysis       |                      | guidelines, including who will have access to     |           |
| 53 |                        |                      | these interim results and make the final decision |           |
| 54 |                        |                      | to terminate the trial                            |           |
| 55 |                        |                      |                                                   |           |
| 56 |                        |                      |                                                   |           |
| 57 |                        |                      |                                                   |           |
| 58 |                        |                      |                                                   |           |
| 59 |                        |                      |                                                   |           |
| 60 |                        |                      |                                                   |           |

|    |                      |                      |                                                      |    |
|----|----------------------|----------------------|------------------------------------------------------|----|
| 1  | Harms                | <a href="#">#22</a>  | Plans for collecting, assessing, reporting, and      |    |
| 2  |                      |                      | managing solicited and spontaneously reported        |    |
| 3  |                      |                      | adverse events and other unintended effects of       |    |
| 4  |                      |                      | trial interventions or trial conduct                 |    |
| 5  |                      |                      |                                                      |    |
| 6  |                      |                      |                                                      |    |
| 7  |                      |                      |                                                      |    |
| 8  |                      |                      |                                                      |    |
| 9  |                      |                      |                                                      |    |
| 10 |                      |                      |                                                      |    |
| 11 | Auditing             | <a href="#">#23</a>  | Frequency and procedures for auditing trial          |    |
| 12 |                      |                      | conduct, if any, and whether the process will be     |    |
| 13 |                      |                      | independent from investigators and the sponsor       |    |
| 14 |                      |                      |                                                      |    |
| 15 |                      |                      |                                                      |    |
| 16 |                      |                      |                                                      |    |
| 17 |                      |                      |                                                      |    |
| 18 |                      |                      |                                                      |    |
| 19 | <b>Ethics and</b>    |                      |                                                      |    |
| 20 |                      |                      |                                                      |    |
| 21 | <b>dissemination</b> |                      |                                                      |    |
| 22 |                      |                      |                                                      |    |
| 23 |                      |                      |                                                      |    |
| 24 | Research ethics      | <a href="#">#24</a>  | Plans for seeking research ethics committee /        | 11 |
| 25 |                      |                      | institutional review board (REC / IRB) approval      |    |
| 26 | approval             |                      |                                                      |    |
| 27 |                      |                      |                                                      |    |
| 28 |                      |                      |                                                      |    |
| 29 | Protocol             | <a href="#">#25</a>  | Plans for communicating important protocol           | 11 |
| 30 |                      |                      | modifications (eg, changes to eligibility criteria,  |    |
| 31 | amendments           |                      | outcomes, analyses) to relevant parties (eg,         |    |
| 32 |                      |                      | investigators, REC / IRBs, trial participants, trial |    |
| 33 |                      |                      | registries, journals, regulators)                    |    |
| 34 |                      |                      |                                                      |    |
| 35 |                      |                      |                                                      |    |
| 36 |                      |                      |                                                      |    |
| 37 |                      |                      |                                                      |    |
| 38 |                      |                      |                                                      |    |
| 39 |                      |                      |                                                      |    |
| 40 |                      |                      |                                                      |    |
| 41 |                      |                      |                                                      |    |
| 42 | Consent or assent    | <a href="#">#26a</a> | Who will obtain informed consent or assent from      | 13 |
| 43 |                      |                      | potential trial participants or authorised           |    |
| 44 |                      |                      | surrogates, and how (see Item 32)                    |    |
| 45 |                      |                      |                                                      |    |
| 46 |                      |                      |                                                      |    |
| 47 |                      |                      |                                                      |    |
| 48 |                      |                      |                                                      |    |
| 49 | Consent or assent:   | <a href="#">#26b</a> | Additional consent provisions for collection and     | NA |
| 50 |                      |                      | use of participant data and biological specimens     |    |
| 51 | ancillary studies    |                      | in ancillary studies, if applicable                  |    |
| 52 |                      |                      |                                                      |    |
| 53 |                      |                      |                                                      |    |
| 54 |                      |                      |                                                      |    |
| 55 |                      |                      |                                                      |    |
| 56 |                      |                      |                                                      |    |
| 57 |                      |                      |                                                      |    |
| 58 |                      |                      |                                                      |    |
| 59 |                      |                      |                                                      |    |
| 60 |                      |                      |                                                      |    |



|    |                       |                      |                                                        |    |
|----|-----------------------|----------------------|--------------------------------------------------------|----|
| 1  | Confidentiality       | <a href="#">#27</a>  | How personal information about potential and           | 11 |
| 2  |                       |                      | enrolled participants will be collected, shared, and   |    |
| 3  |                       |                      | maintained in order to protect confidentiality         |    |
| 4  |                       |                      | before, during, and after the trial                    |    |
| 5  |                       |                      |                                                        |    |
| 6  |                       |                      |                                                        |    |
| 7  |                       |                      |                                                        |    |
| 8  |                       |                      |                                                        |    |
| 9  |                       |                      |                                                        |    |
| 10 |                       |                      |                                                        |    |
| 11 | Declaration of        | <a href="#">#28</a>  | Financial and other competing interests for            | 12 |
| 12 | interests             |                      | principal investigators for the overall trial and      |    |
| 13 |                       |                      | each study site                                        |    |
| 14 |                       |                      |                                                        |    |
| 15 |                       |                      |                                                        |    |
| 16 |                       |                      |                                                        |    |
| 17 |                       |                      |                                                        |    |
| 18 |                       |                      |                                                        |    |
| 19 | Data access           | <a href="#">#29</a>  | Statement of who will have access to the final trial   | 11 |
| 20 |                       |                      | dataset, and disclosure of contractual                 |    |
| 21 |                       |                      | agreements that limit such access for                  |    |
| 22 |                       |                      | investigators                                          |    |
| 23 |                       |                      |                                                        |    |
| 24 |                       |                      |                                                        |    |
| 25 |                       |                      |                                                        |    |
| 26 |                       |                      |                                                        |    |
| 27 |                       |                      |                                                        |    |
| 28 |                       |                      |                                                        |    |
| 29 | Ancillary and post    | <a href="#">#30</a>  | Provisions, if any, for ancillary and post-trial care, | NA |
| 30 | trial care            |                      | and for compensation to those who suffer harm          |    |
| 31 |                       |                      | from trial participation                               |    |
| 32 |                       |                      |                                                        |    |
| 33 |                       |                      |                                                        |    |
| 34 |                       |                      |                                                        |    |
| 35 |                       |                      |                                                        |    |
| 36 | Dissemination         | <a href="#">#31a</a> | Plans for investigators and sponsor to                 | 11 |
| 37 | policy: trial results |                      | communicate trial results to participants,             |    |
| 38 |                       |                      | healthcare professionals, the public, and other        |    |
| 39 |                       |                      | relevant groups (eg, via publication, reporting in     |    |
| 40 |                       |                      | results databases, or other data sharing               |    |
| 41 |                       |                      | arrangements), including any publication               |    |
| 42 |                       |                      | restrictions                                           |    |
| 43 |                       |                      |                                                        |    |
| 44 |                       |                      |                                                        |    |
| 45 |                       |                      |                                                        |    |
| 46 |                       |                      |                                                        |    |
| 47 |                       |                      |                                                        |    |
| 48 |                       |                      |                                                        |    |
| 49 |                       |                      |                                                        |    |
| 50 |                       |                      |                                                        |    |
| 51 |                       |                      |                                                        |    |
| 52 |                       |                      |                                                        |    |
| 53 | Dissemination         | <a href="#">#31b</a> | Authorship eligibility guidelines and any intended     | NA |
| 54 | policy: authorship    |                      | use of professional writers                            |    |
| 55 |                       |                      |                                                        |    |
| 56 |                       |                      |                                                        |    |
| 57 |                       |                      |                                                        |    |
| 58 |                       |                      |                                                        |    |
| 59 |                       |                      |                                                        |    |
| 60 |                       |                      |                                                        |    |

1 Dissemination [#31c](#) Plans, if any, for granting public access to the full NA  
 2  
 3 policy: reproducible protocol, participant-level dataset, and statistical  
 4  
 5 research code  
 6  
 7

## 8 Appendices

9  
 10  
 11  
 12 Informed consent [#32](#) Model consent form and other related NA  
 13  
 14 materials documentation given to participants and  
 15  
 16 authorised surrogates  
 17  
 18

19  
 20 Biological [#33](#) Plans for collection, laboratory evaluation, and NA  
 21  
 22 specimens storage of biological specimens for genetic or  
 23  
 24 molecular analysis in the current trial and for  
 25  
 26 future use in ancillary studies, if applicable  
 27  
 28

29  
 30 None The SPIRIT Explanation and Elaboration paper is distributed under the terms of the Creative  
 31  
 32 Commons Attribution License CC-BY-NC. This checklist can be completed online using  
 33  
 34 <https://www.goodreports.org/>, a tool made by the [EQUATOR Network](#) in collaboration with  
 35  
 36 [Penelope.ai](#)  
 37  
 38  
 39  
 40  
 41  
 42  
 43  
 44  
 45  
 46  
 47  
 48  
 49  
 50  
 51  
 52  
 53  
 54  
 55  
 56  
 57  
 58  
 59  
 60
